RESEARCH ARTICLE

# The early human interferon gamma response to *Toxoplasma gondii* is driven by Vγ9Vδ2 T-cell sensing of host phosphoantigens and subsequent NK-cell activation

Felipe Rodriguez, Jeroen P. J. Saeij<sup>\*</sup>

Department of Pathology, Microbiology and Immunology, School of Veterinary Medicine, University of California, Davis, California, United States of America

\* [jsaeij@ucdavis.edu](mailto:jsaeij@ucdavis.edu)

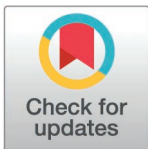

## OPEN ACCESS

**Citation:** Rodriguez F, Saeij JPJ (2025) The early human interferon gamma response to *Toxoplasma gondii* is driven by Vγ9Vδ2 T-cell sensing of host phosphoantigens and subsequent NK-cell activation. PLoS Pathog 21(12): e1013829. <https://doi.org/10.1371/journal.ppat.1013829>

**Editor:** Anita Koshy, University of Arizona Health Sciences Center: The University of Arizona Health Sciences, UNITED STATES OF AMERICA

**Received:** September 16, 2025

**Accepted:** December 18, 2025

**Published:** December 26, 2025

**Copyright:** © 2025 Rodriguez, Saeij. This is an open access article distributed under the terms of the [Creative Commons Attribution License](https://creativecommons.org/licenses/by/4.0/), which permits unrestricted use, distribution, and reproduction in any medium, provided the original author and source are credited.

**Data availability statement:** All relevant data are in the manuscript and [supporting information](#).

## Abstract

*Toxoplasma gondii* is a globally prevalent intracellular parasite that infects ~40 million Americans. The murine immune response to *Toxoplasma* relies on both toll-like receptor (TLR) 11/12 and immunity related GTPase-mediated (IRGs) responses, which humans lack, making it unclear how the human immune response detects and responds to the parasite. We investigated whether human Vγ9Vδ2 T cells, which detect phosphoantigens through the BTN3A1 receptor, shape the early immune response to the parasite. Using primary human peripheral blood mononuclear cells (PBMCs), we show that Vγ9Vδ2 T cells are activated by *Toxoplasma*-infected cells in a BTN3A1-dependent manner leading to secretion of interferon gamma (IFNγ) and tumor necrosis factor-alpha (TNFα). Additionally, these T cells potentiate IFNγ production by natural killer (NK) cells, via TNFα and interleukin (IL)-12 produced during infection. Active parasite invasion is required to stimulate the IFNγ response, and inhibition of the host mevalonate pathway, which limits the synthesis of the phosphoantigen isopentenyl pyrophosphate (IPP), attenuates the cytokine response, indicating *Toxoplasma* infection increases host phosphoantigens leading to Vγ9Vδ2 T cell activation. Our findings identify Vγ9Vδ2 T cells as key effectors that potentiate NK cells in the early human immune response to *Toxoplasma*, bridging innate and adaptive immunity in the absence of TLR11/12 signaling.

## Author summary

*Toxoplasma gondii* is a common parasite that infects about one third of the world's population. Most healthy people do not get sick, but infection can cause severe disease in unborn babies and people with weak immune systems. We wanted to know how the human immune system detects this parasite early during infection. Because mice rely on sensors that humans do not have, we

**Funding:** JPJS received funding from National Institute of Allergy and Infectious Diseases of the National Institutes of Health under R01AI173803. FR received fellowships from the Graduate Student Support Program (GSSP) supported by the Hart endowed fellowship and Vivian and Dorothea Hagaman fellowship. Additionally, FR received a UC Davis internal fellowship supported by Stephen F. and Bettina A. Sims Immunology fellowship. The funders had no role in study design, data collection and analysis, decision to publish, or preparation of the manuscript.

**Competing interests:** The authors have declared that no competing interests exist.

focused on a human specific group of T cells called V gamma 9 V delta 2 T cells. We found that these cells respond to infection by producing interferon gamma, a signaling protein that helps other immune cells control the parasite. This early response occurs when infection alters a pathway that cells use to make cholesterol and other lipids, called the mevalonate pathway. These changes increase small phosphorus containing molecules that are detected by an internal region of the immune cell membrane protein butyrophilin 3A1. Once activated, V gamma 9 V delta 2 T cells also make tumor necrosis factor and help natural killer cells produce more interferon gamma, forming an early immune circuit that likely strengthens human resistance to *Toxoplasma*.

## Introduction

*Toxoplasma gondii* is an intracellular apicomplexan parasite that remains a leading cause of foodborne mortality. Felines are its definitive host and can shed millions of infectious oocysts, leading to widespread environmental contamination [1,2]. Following ingestion of oocysts or tissue cysts, the parasite disseminates and, by converting to slowly replicating bradyzoites within tissue cysts, establishes long-lived infection. This form is notably resistant to immune clearance, and reactivation of tissue cysts in immunosuppressed individuals can cause severe pathology including brain lesions and necrotizing retinitis, potentially resulting in death. *Toxoplasma* can also cause miscarriage in pregnant mothers infected for the first time [3]. Inside host cells, *Toxoplasma* resides in a parasitophorous vacuole (PV), separated from the host cell cytosol by the PV membrane (PVM), which offers a replication niche [4].

In mice, toll-like-receptor (TLR) 11/12 activation by *Toxoplasma* actin-binding protein profilin, triggers dendritic cells (DCs) to secrete interleukin (IL)-12 which activates natural killer (NK), CD4, and CD8 T cells to secrete interferon gamma (IFN $\gamma$ ), which can be further enhanced by IL-18 and IL-1 $\beta$  [5–7]. IFN $\gamma$  upregulates multiple interferon-stimulated genes with parasitocidal properties. In mice, IFN $\gamma$  upregulates the expression of immunity-related GTPases (IRGs), which can destroy the PV and thereby eliminate *Toxoplasma*'s replication niche. *Toxoplasma* secretes a plethora of effector proteins (dense granule antigens (GRAs) and rhoptry bulb proteins (ROPs)) into the host cytosol that hijack host cell signaling pathways and prevent the host from mounting an appropriate immune response [8,9]. In mice, GRAs and ROPs block IRGs from destroying the PV [10]. However, humans lack TLR11/12 and IFN $\gamma$ -inducible IRGs, and *Toxoplasma* ROPs that determine virulence in rodents (ROP5/ROP18) have not yet been shown to play a role in human infection [11]. Thus, we currently have an incomplete understanding of what human immune cells are orchestrating cytokine secretion to *Toxoplasma*, and how the human immune system detects and destroys *Toxoplasma*.

Early studies have shown that *Toxoplasma* can infect any nucleated cell and use blood to spread throughout the host [12,13]. Human peripheral blood mononuclear cells (PBMCs) consist of ~10% monocytes, ~60% T cells, and ~15% NK cells [14],

which play an important role in defense against infections. V $\gamma$ 9V $\delta$ 2 T cells, which constitute up to 3% of human peripheral T lymphocytes and dominate the circulating  $\gamma\delta$  pool, recognize non-peptidic prenyl-pyrophosphate antigens such as (E)-4-hydroxy-3-methyl-but-2-enyl pyrophosphate (HMBPP) and isopentenyl pyrophosphate (IPP) derived from bacteria such as *Mycobacterium tuberculosis* and *Listeria monocytogenes* or protozoan parasites like *Plasmodium* spp. [15–19]. Additionally, tumor cells upregulate IPP via the mevalonate pathway, which can stimulate V $\gamma$ 9V $\delta$ 2 T cells leading to cell death [20]. Phosphoantigen-reactive V $\gamma$ 9V $\delta$ 2 T cells exist only in humans, non-human primates, and alpacas and make up to 90% of total peripheral blood  $\gamma\delta$  T cells in healthy adults [21,22]. V $\gamma$ 9V $\delta$ 2 T cells are important in both innate and adaptive immunity and mount major expansion and effector responses during infections [23–25]. V $\gamma$ 9V $\delta$ 2 T cells do not detect phosphoantigens directly but instead bind to the butyrophilin 2A and 3A (BTN2A1/BTN3A1) dual receptors. Phosphoantigens bind to the intracellular B30.2 domain of the BTN3A1 receptor promoting the hetero-dimerization to BTN2A1, which is subsequently detected by V $\gamma$ 9V $\delta$ 2 T cells resulting in their activation and secretion of IFN $\gamma$  and TNF $\alpha$ , leading to activation of host cells [20,26,27].

*Toxoplasma* utilizes a specialized organelle known as the apicoplast, which evolutionarily is of bacterial origin, for synthesizing isoprenoid precursors through the methyl-erythritol phosphate (DOXP) pathway, producing HMBPP and theoretically providing a ligand for V $\gamma$ 9V $\delta$ 2 T cell activation [28]. Limited observations suggest V $\gamma$ 9V $\delta$ 2 T cells are cytotoxic toward *Toxoplasma*-infected cells [29] and increase numbers in congenitally infected fetuses [30], but a mechanistic link between parasite-derived HMBPP, butyrophilin receptor engagement, and early IFN $\gamma$  release has not been demonstrated.

Here we show that *Toxoplasma* indirectly activates human V $\gamma$ 9V $\delta$ 2 T cells via BTN3A1, leading to rapid IFN $\gamma$  secretion and potentiation of NK cells. These findings support a model in which V $\gamma$ 9V $\delta$ 2 T cells compensate for the absence of TLR11/12 in humans by providing an early source of IFN $\gamma$  and by licensing other innate lymphocytes, thereby constraining parasite replication before conventional  $\alpha\beta$  T-cell immunity is established.

## Results

### BTN3A1-dependent IFN $\gamma$ production by human V $\gamma$ 9V $\delta$ 2 T cells in response to HMBPP

Considering that PBMCs contain a diverse repertoire of T and NK cells, it remains unclear which specific cell types are driving cytokine production during *Toxoplasma* infection. Given that *Toxoplasma* utilizes the 1-deoxy-D-xylulose-5-phosphate (DOXP) pathway for lipid and HMBPP production [28,31], we hypothesized that V $\gamma$ 9V $\delta$ 2 T cells are activated upon *Toxoplasma*-derived HMBPP exposure.

To optimize our protocols, we first exposed PBMCs from *Toxoplasma*-seronegative donors (S1A Fig) to commercially sourced HMBPP, either alone or with apyrase, a terminal phosphatase that can cleave HMBPP, thus preventing its stimulatory effect on V $\gamma$ 9V $\delta$ 2 T cells via BTN3A1/BTN2A1 receptors [32,33]. Because BTN3A1 senses phosphoantigens via its intracellular B30.2 domain, exogenously added HMBPP is thought to act after energy-dependent uptake into BTN3A1-expressing cells. Exogenous HMBPP significantly promoted IFN $\gamma$  secretion from human PBMCs, which was abrogated by apyrase (Fig 1A). Because V $\gamma$ 9V $\delta$ 2 T cells recognize phosphoantigens via BTN3A1, we next tested whether blocking this receptor affects the response. Addition of a BTN3A1 blocking antibody, but not an IgG1 isotype control antibody, blocked IFN $\gamma$  secretion, showing that IFN $\gamma$  secretion was dependent on the BTN3A1 receptor (Fig 1A). Flow cytometry was then used to investigate the source of IFN $\gamma$  in response to HMBPP. The gating strategy is shown in S1B and S1C Fig. Baseline frequencies of V $\gamma$ 9V $\delta$ 2 T cells differed between donors, likely explaining some of the variability in our assays (Fig 1B). HMBPP significantly increased the percentage of IFN $\gamma$ -producing CD3<sup>+</sup>V $\gamma$ 9<sup>+</sup> cells, which was inhibited by both apyrase and BTN3A1 blocking antibody. Despite inter-donor variability, the percentage of IFN $\gamma$ -positive V $\gamma$ 9<sup>+</sup> T cells was significantly reduced when apyrase or BTN3A1 blocking antibody were added with HMBPP (Fig 1C). Integrated mean fluorescent intensity (iMFI) analysis showed that iMFI levels in IFN $\gamma$ -positive V $\gamma$ 9V $\delta$ 2 cells were significantly higher in HMBPP-stimulated cells compared to those where HMBPP-stimulated cells were also treated with either apyrase or BTN3A1 blocking antibody (Fig 1D) [34]. To determine whether HMBPP activates other immune cells to secrete IFN $\gamma$ , we

(D1, D4, D7, D8, D9, D10, D11, D12)

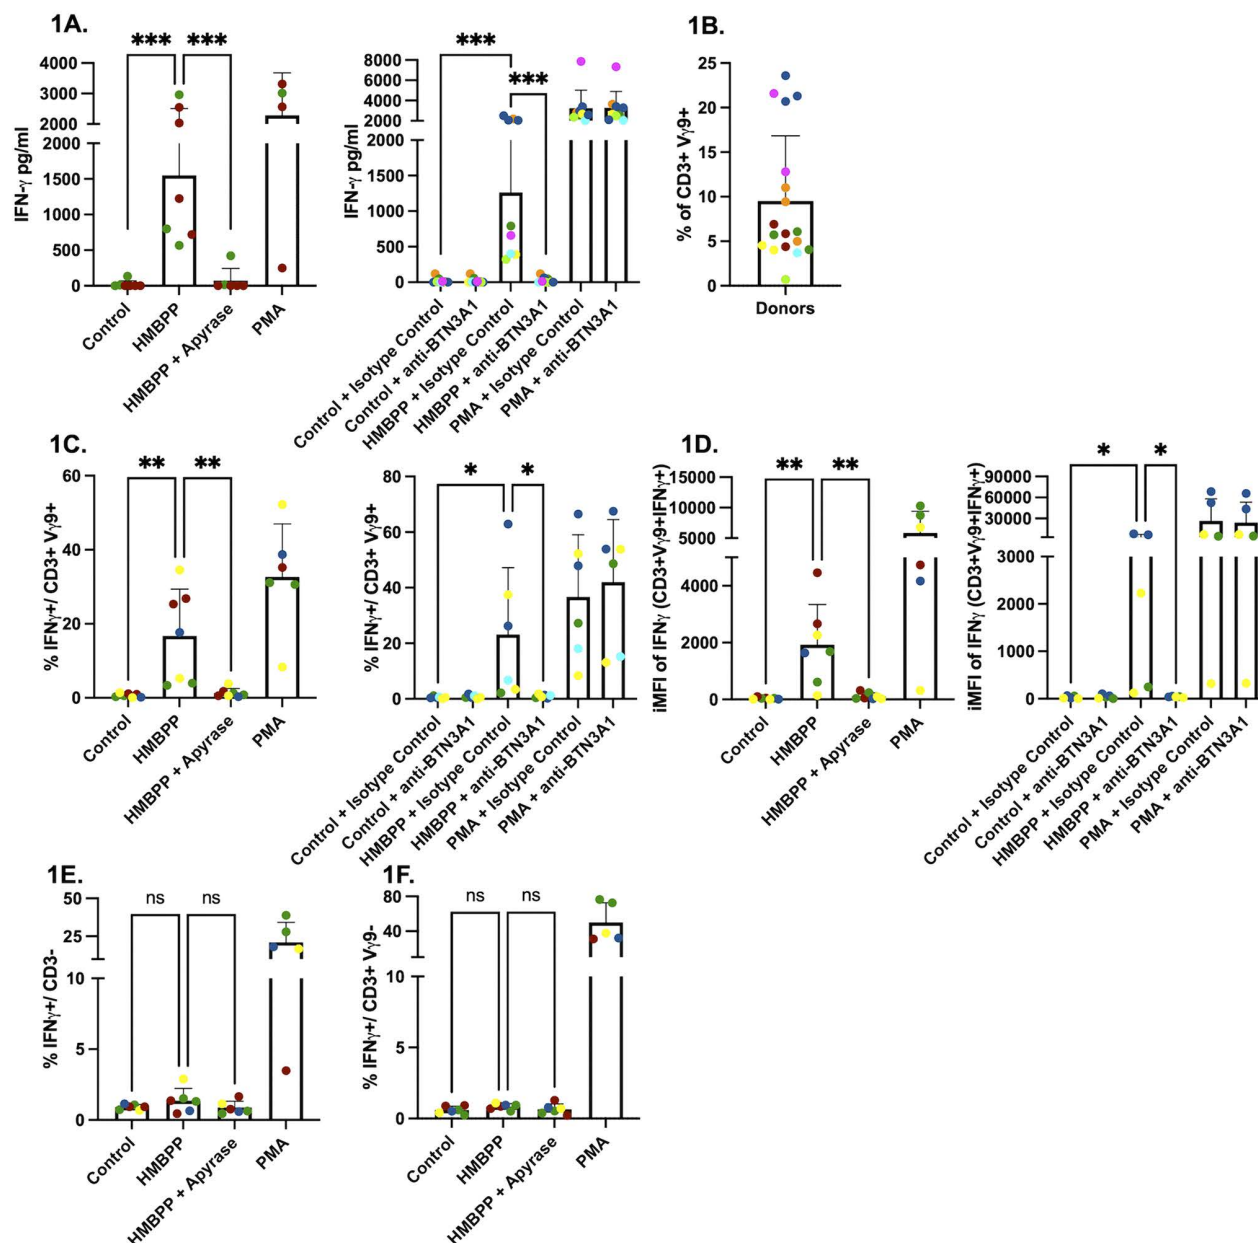

**Fig 1. HMBPP stimulates human V $\gamma$ 9V $\delta$ 2 T cells leading to the production of IFN $\gamma$ .** (A) PBMCs ( $5 \times 10^5$ /well) were left untreated or were incubated for 24 hours with HMBPP (312 nM) or PMA/ionomycin (1x). Cultures contained either apyrase (200 IU/ml), or BTN3A1 blocking antibody (0.1  $\mu$ g/ml), or IgG1 isotype control antibody (0.1  $\mu$ g/ml). IFN $\gamma$  concentrations (pg/ml) in culture supernatants were measured by ELISA. (B) The percentage of CD3+V $\gamma$ 9+ cells in each donor. (C) Percentages of lymphocytes/single cells/alive/CD3+V $\gamma$ 9+/IFN $\gamma$ +. (D) (iMFI) of IFN $\gamma$  in V $\gamma$ 9+ cells. (E) Percentages of lymphocytes/single cells/alive/CD3-/IFN $\gamma$ +. (F) Percentages of lymphocytes/single cells/alive/CD3+V $\gamma$ 9-/IFN $\gamma$ +. Percentages and iMFI were quantified and compared across conditions: control, HMBPP, HMBPP + apyrase, and PMA/ionomycin with or without BTN3A1 blocking antibody (0.1  $\mu$ g/ml), and with or without IgG1 isotype control antibody (0.1  $\mu$ g/ml) (right). Colored dots represent different donors. Statistical significance was calculated using ordinary one-way ANOVA. Asterisks indicate levels of statistical significance: \* $p < 0.05$ , \*\* $p < 0.01$ , \*\*\* $p < 0.001$ ; ns indicates a non-significant difference.

<https://doi.org/10.1371/journal.ppat.1013829.g001>



gated IFN $\gamma$ -positive CD3 $^+$  cells (Fig 1E), and IFN $\gamma$ -positive CD3 $^+$ V $\gamma$ 9 $^+$  cells (Fig 1F), which encompasses CD4 and CD8 T cells, and NK cells, respectively, and noticed no difference in percentage of IFN $\gamma$ -positive cells. Overall, these results demonstrate that 1) donors vary in V $\gamma$ 9 $^+$  T cell frequency in blood, 2) these cells are the primary mediators of IFN $\gamma$  secretion when stimulated with exogenous HMBPP, and 3) HMBPP-mediated induction of IFN $\gamma$  is blocked both by apyrase and BTN3A1 blocking antibody.

### V $\gamma$ 9V $\delta$ 2 T cell activation and IFN $\gamma$ secretion require *Toxoplasma* invasion and BTN3A1 signaling

To determine whether parasite replication is necessary for IFN $\gamma$  secretion, we infected PBMCs with the uracil-auxotrophic strain RH $\Delta$ ompdc $\Delta$ up under uracil-free conditions (S2 Fig). These non-replicating parasites still triggered significant IFN $\gamma$  secretion (Fig 2A). In contrast, pretreatment of the parasites with mycalolide B, which blocks actin-driven invasion [35], significantly reduced IFN $\gamma$  release (Fig 2A), indicating that intracellular entry rather than replication *per se* is required.

To limit PBMC death we utilized RH $\Delta$ ompdc $\Delta$ up in subsequent experiments. Infection with RH $\Delta$ ompdc $\Delta$ up induced high IFN $\gamma$  levels, and these were significantly diminished by a BTN3A1-blocking antibody but not by an IgG1 isotype control (Fig 2B). Phosphoantigens from *Plasmodium falciparum* are liberated from infected red blood cells upon schizont rupture [18], raising the possibility that extracellular release might also occur here. We therefore added apyrase, which dephosphorylates HMBPP, during infections with RH $\Delta$ ompdc $\Delta$ up parasites. Apyrase, a membrane-impermeant enzyme that hydrolyzes extracellular pyrophosphates, abolished HMBPP-driven IFN $\gamma$  yet had no effect during infection (Fig 2C), indicating that the BTN3A1-activating phosphoantigen is generated or retained inside infected host cells and is inaccessible to apyrase.

Consistent with an intracellular source of the activating ligand, a 0.4  $\mu$ m transwell assay showed that V $\gamma$ 9 $^+$ IFN $\gamma$  $^+$  T-cells were confined to the infected insert compartment, while HMBPP readily diffused to activate V $\gamma$ 9 $^+$ T-cells in both compartments, which was abolished by apyrase (S3 Fig). Flow cytometric analysis (S1D Fig) confirmed that the IFN $\gamma$  detected by ELISA originates from V $\gamma$ 9V $\delta$ 2 T cells. Infection increased both the percentage of CD3 $^+$ V $\gamma$ 9 $^+$ lymphocytes producing IFN $\gamma$  and their iMFI (Fig 2D and 2E). The same population upregulated the IL-2 alpha chain (CD25), an early activation marker (Fig 2F). In each case, BTN3A1 antibody blockade abolished the response, whereas the IgG1 isotype control antibody had no effect. Additionally, to determine which cell types were infected, we used GFP-expressing parasites and found that infection was not restricted to a single cell population after 24 hours (S4 Fig). Overall, these findings demonstrate that V $\gamma$ 9V $\delta$ 2 T cells are the primary source of IFN $\gamma$  in parasite-infected PBMCs cultures and their activation requires parasite invasion and signaling through the BTN3A1 receptor, but not intracellular parasite replication.

### Host, not parasite, isoprenoid biosynthesis drives V $\gamma$ 9V $\delta$ 2 T cell IFN $\gamma$ production during *Toxoplasma* infection

We sought to determine if parasite-derived or host-derived phosphoantigens were driving IFN $\gamma$  induction. To determine if IFN $\gamma$  production is driven by parasite-derived phosphoantigen we adapted an approach previously used for generating *Plasmodium falciparum* supernatants [18], and generated human foreskin fibroblasts (HFF) lysate and *Toxoplasma* RH $\Delta$ ompdc $\Delta$ up lysate that was filtered using a 3kDa filter to enrich for *Toxoplasma*-derived phosphoantigens. However, the 3kDa filtrate did not stimulate IFN $\gamma$  secretion in PBMCs (Fig 3A). *Toxoplasma* lacks the mevalonate pathway and relies solely on the DOXP pathway within its apicoplast for isoprenoid precursor synthesis. Wild-type tachyzoites are intrinsically resistant to fosmidomycin, a competitive inhibitor of DOXP reductoisomerase (DOXPRI), because the drug does not cross the parasite plasma membrane and fails to accumulate at the enzymatic target [28]. To bypass this permeability barrier, we used the GlpT strain, engineered to express the *E. coli* glycerol-3-phosphate/phosphate antiporter (GlpT) [28]. Heterologous GlpT facilitates fosmidomycin uptake allowing DOXPRI inhibition, thereby limiting downstream production of HMBPP (S5 Fig). Substitution of GlpT R45 to K and R269 to K (R45K-R269K) abolishes the activity of GlpT [28].

Pre-treatment of GlpT (Fos-sensitive) and R45K-R269K (Fos-resistant) parasites with 100  $\mu$ M fosmidomycin for 24 hours and subsequently using them to infect PBMCs led to no difference in IFN $\gamma$  secretion (Fig 3B) even though plaque

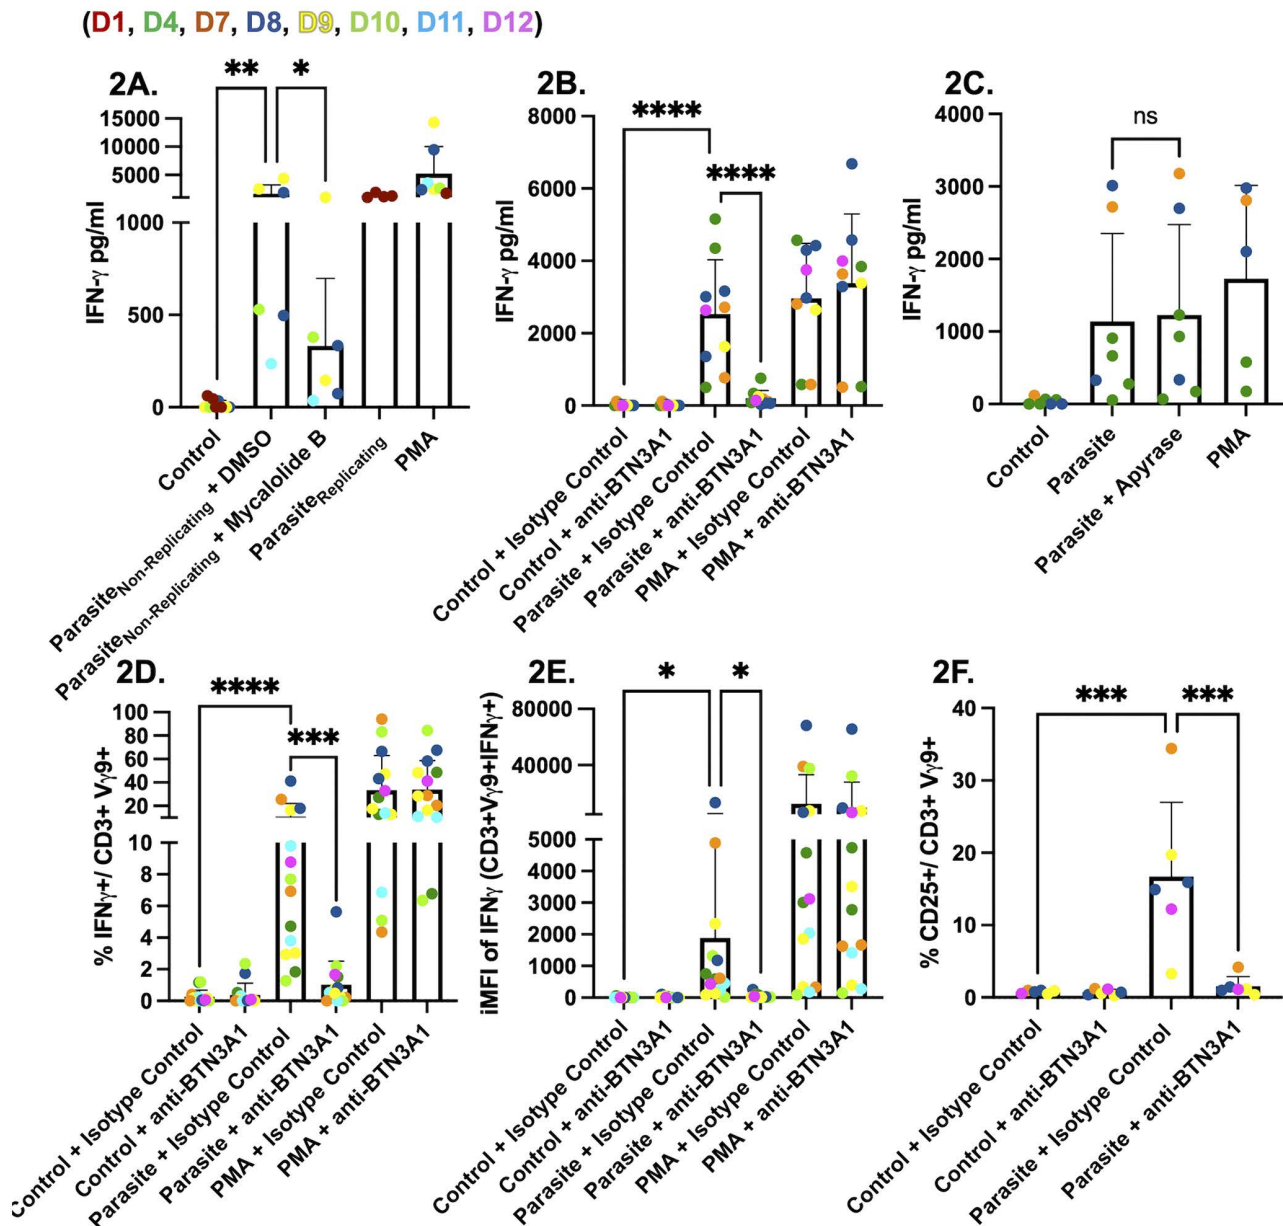

**Fig 2. *Toxoplasma* stimulates V $\gamma$ 9V $\delta$ 2 T cells to produce IFN $\gamma$  via BTN3A1.** (A) PBMcs ( $5 \times 10^5$ /well) were infected for 24 hours with non-replicating RH $\Delta$ ompdc $\Delta$ up parasites (non-replicating parasites) treated with or without Mycalolide B (10  $\mu$ M) or with DMSO as a control, or infected with replicating parasites. PMA/ionomycin (1x) was used as a positive control, while unstimulated PBMcs were used as a negative control. IFN $\gamma$  in culture supernatants was quantified by ELISA. (B) PBMcs were left untreated, infected for 24 hours with RH $\Delta$ ompdc $\Delta$ up parasites at an MOI of 0.6, or stimulated with PMA/ionomycin (1x). Cultures contained either BTN3A1-blocking antibody (0.1  $\mu$ g/ml) or an IgG1 isotype control antibody (0.1  $\mu$ g/ml), or no antibody. IFN $\gamma$  release was measured as in panel A. (C) PBMcs were infected for 24 hours with RH $\Delta$ ompdc $\Delta$ up or RH wild-type parasites (MOI 0.6) with or without apyrase (200 IU/ml). PMA-stimulated and unstimulated cells served as controls. IFN $\gamma$  concentrations (pg/ml) were determined by ELISA. (D & E) Intracellular cytokine staining of panel D shows the percentage of viable CD3 $^+$  V $\gamma$ 9 $^+$  lymphocytes that are IFN $\gamma$ -positive; panel E shows the (iMFI) of IFN $\gamma$  within the V $\gamma$ 9 $^+$  gate. (F) Activation marker analysis of the same samples: percentage of viable CD3 $^+$  V $\gamma$ 9 $^+$  lymphocytes expressing CD25. Data represent means + SD from multiple donors (individual data points shown). Statistical significance was calculated using one-way ANOVA followed by Tukey's multiple comparison test. Asterisks indicate levels of statistical significance: \* $p$  < 0.05, \*\* $p$  < 0.01, \*\*\* $p$  < 0.001, \*\*\*\* $p$  < 0.0001; ns indicates a non-significant difference.

<https://doi.org/10.1371/journal.ppat.1013829.g002>

(D1, D4, D7, D8, D9, D10, D11, D12)

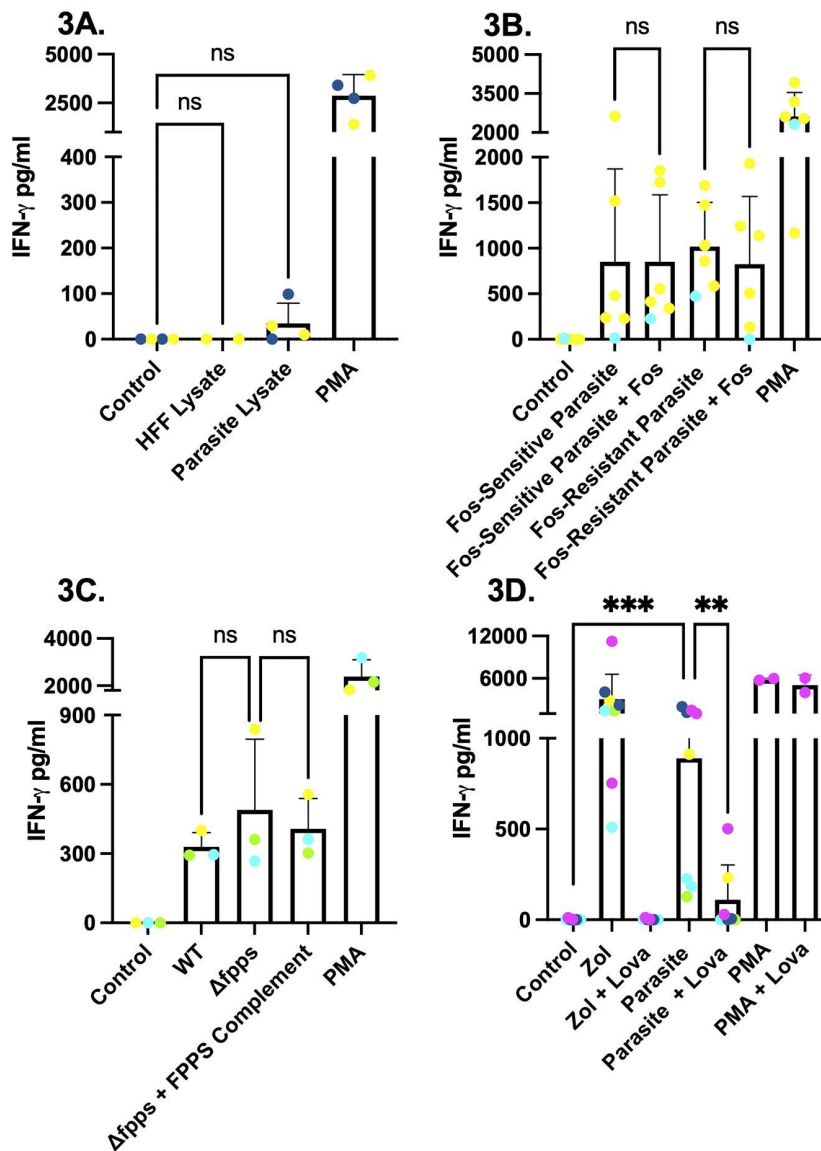

**Fig 3. Cell-free parasite lysate, DOXP-pathway inhibition, and loss of farnesyl-pyrophosphate synthase do not reduce IFN $\gamma$  release from *Toxoplasma*-infected PBMCs.** (A) PBMCs ( $5 \times 10^5$ /well) were incubated for 24 hours with: HFF lysate or sonicated lysate from RH $\Delta$ ompdc $\Delta$ up-infected HFFs. The lysates were passed through a 3 kDa filter. PMA/ionomycin (1x) was used as a positive control, while unstimulated PBMCs were used as a negative control. (B) PBMCs were infected for 24 hours with GlpT (Fos-sensitive) or GlpT R45K-R269K (Fos-resistant)-expressing parasites with or without fosmidomycin (100  $\mu$ M), an inhibitor of the DOXP pathway. (C) PBMCs were infected with RH $\Delta$ hpt (WT), RH $\Delta$ hpt $\Delta$ fpps (farnesyl-pyrophosphate-synthase knockout), or the corresponding complemented knockout strain for 24 hours. (D) PBMCs were pre-incubated with lovastatin (Lova) (25  $\mu$ M) and/or zoledronate (Zol) (45  $\mu$ M), washed three times, and then infected with RH $\Delta$ ompdc $\Delta$ up parasites for 24 hours. In all panels, IFN $\gamma$  concentrations (pg/ml) in culture supernatants were measured by ELISA. Data represent means  $\pm$  SD from multiple donors (individual data points shown). Statistical significance was calculated using one-way ANOVA followed by Tukey's multiple comparison test. Asterisks indicate levels of statistical significance: \* $p < 0.05$ , \*\* $p < 0.01$ , \*\*\* $p < 0.001$ ; ns indicates a non-significant difference.

<https://doi.org/10.1371/journal.ppat.1013829.g003>

assays confirmed their susceptibility to fosmidomycin (S6 Fig). Deletion of farnesyl-pyrophosphate synthase (FPPS) [36], which lies immediately downstream of HMBPP, should allow HMBPP to accumulate while preventing flux into longer-chain isoprenoids (S5 Fig). FPPS knockout parasites were validated by demonstrating their susceptibility to lovastatin (S7A Fig), which inhibits host HMG-CoA reductase thereby preventing the FPPS knockout parasites from using host longer-chain isoprenoids, and then used to infect PBMCs. IFN $\gamma$  secretion was not different between FPPS knockout and wild-type infection, arguing against an important role for parasite-derived HMBPP (Fig 3C).

Next, to assess the contribution of host isoprenoid biosynthesis, we treated infected PBMC cultures with lovastatin, a selective inhibitor of host 3-hydroxy-3-methylglutaryl-CoA reductase (HMG-CoA) (S5 Fig). As a control we used zoledronate (Zol), an inhibitor of farnesyl pyrophosphate synthase (FPPS) (S5 Fig), leading to accumulation of host IPP [37]. Zoledronate led to robust IFN $\gamma$  secretion while lovastatin significantly reduced IFN $\gamma$  secretion. Similarly, lovastatin significantly reduced parasite-induced IFN $\gamma$  secretion, consistent with a model in which BTN3A1-restricted V $\gamma$ 9V $\delta$ 2 T cells respond primarily to host-generated IPP rather than to parasite-derived HMBPP (Fig 3D). Lastly, as a control, we confirmed that neither lovastatin nor fosmidomycin affected PBMC responses to HMBPP stimulation (S7B Fig). Overall, these results indicate that IFN $\gamma$  production requires an active intracellular parasite infection but depends more critically on the host mevalonate pathway than on the parasite DOXP pathway.

### **V $\gamma$ 9V $\delta$ 2 T cells mediate BTN3A1-dependent activation of NK cells via TNF $\alpha$ to promote IFN $\gamma$ responses to *Toxoplasma***

To determine if IFN $\gamma$  is produced by cell populations other than V $\gamma$ 9V $\delta$ 2 T cells, PBMCs were gated on CD3<sup>+</sup>V $\gamma$ 9<sup>-</sup> lymphocytes (mainly conventional CD4 and CD8 T cells) and on CD3<sup>+</sup> lymphocytes (predominantly NK cells) [14] within our population. We saw no differences in either the percentage or iMFI of CD3<sup>+</sup>V $\gamma$ 9<sup>-</sup>IFN $\gamma$ <sup>+</sup> cells between our control and infected PBMCs at 24 hours (Fig 4A and 4B). Extending cultures to 48 hours similarly revealed no increase in CD3<sup>+</sup>V $\gamma$ 9<sup>-</sup>IFN $\gamma$ <sup>+</sup> cells relative to controls, indicating that a delayed  $\alpha$  $\beta$  T-cell IFN $\gamma$  response does not arise under these conditions (S8 Fig). In contrast, we saw a significant increase in the percentage (Fig 4C) and iMFI (Fig 4D) of CD3<sup>+</sup>IFN $\gamma$ <sup>+</sup> cells in parasite infected PBMCs; this increase was significantly reduced by an anti-BTN3A1 blocking antibody but not by IgG1 isotype control. To confirm that CD3<sup>+</sup>IFN $\gamma$ <sup>+</sup> cells were NK cells, we used the CD56 marker and again observed a significant increase in both the percentage (Fig 4E) and iMFI (Fig 4F) of CD3<sup>+</sup>CD56<sup>+</sup>IFN $\gamma$ <sup>+</sup> cells in infected PBMCs. This increase was reduced when BTN3A1 blocking antibody was added to the cultures. These results indicate that NK cell IFN $\gamma$  production during *Toxoplasma* infection is dependent on BTN3A1 signaling, suggesting that NK cells act as secondary responders following initial V $\gamma$ 9V $\delta$ 2 T cell activation.

This led us to hypothesize that V $\gamma$ 9V $\delta$ 2 T cells drive IFN $\gamma$  secretion from NK cells through a BTN3A1-dependent release of TNF $\alpha$  that acts in concert with IL-12 secreted by infected monocytes [38]. Consistent with this model, parasite infection increased IL-12 in culture supernatants, and anti-BTN3A1 had no effect on this increase (Fig 4G). However, we saw no differences in IL-12 secretion in CD3<sup>+</sup> cells (Fig 4H).

In contrast, TNF $\alpha$  secretion was robust in *Toxoplasma*-infected PBMCs but was significantly reduced when BTN3A1 signaling was blocked (Fig 4I). Intracellular cytokine staining confirmed that V $\gamma$ 9V $\delta$ 2 T cells produced most of this cytokine: parasite infection increased both the frequency of TNF $\alpha$ -positive V $\gamma$ 9V $\delta$ 2 T cells (Fig 4J) and their iMFI (Fig 4K), whereas BTN3A1 inhibition returned both measures to baseline. Together, these data indicate that while V $\gamma$ 9V $\delta$ 2 T cells are the primary BTN3A1-dependent responders to *Toxoplasma* infection, the TNF $\alpha$  they secrete may reinforce IL-12-driven NK-cell activation, leading to a secondary wave of IFN $\gamma$  production.

### **NK cells predominantly produce IFN $\gamma$ in response to V $\gamma$ 9V $\delta$ 2 T cells which is dependent on both IL-12 and TNF $\alpha$**

To determine whether IL-12 or TNF $\alpha$  influence IFN $\gamma$  production by NK cells, we treated PBMCs at the start of infection with anti-IL-12/23 p40, anti-TNF $\alpha$ , or both. IL-12 blockade markedly reduced IFN $\gamma$  in supernatants, and additional TNF $\alpha$



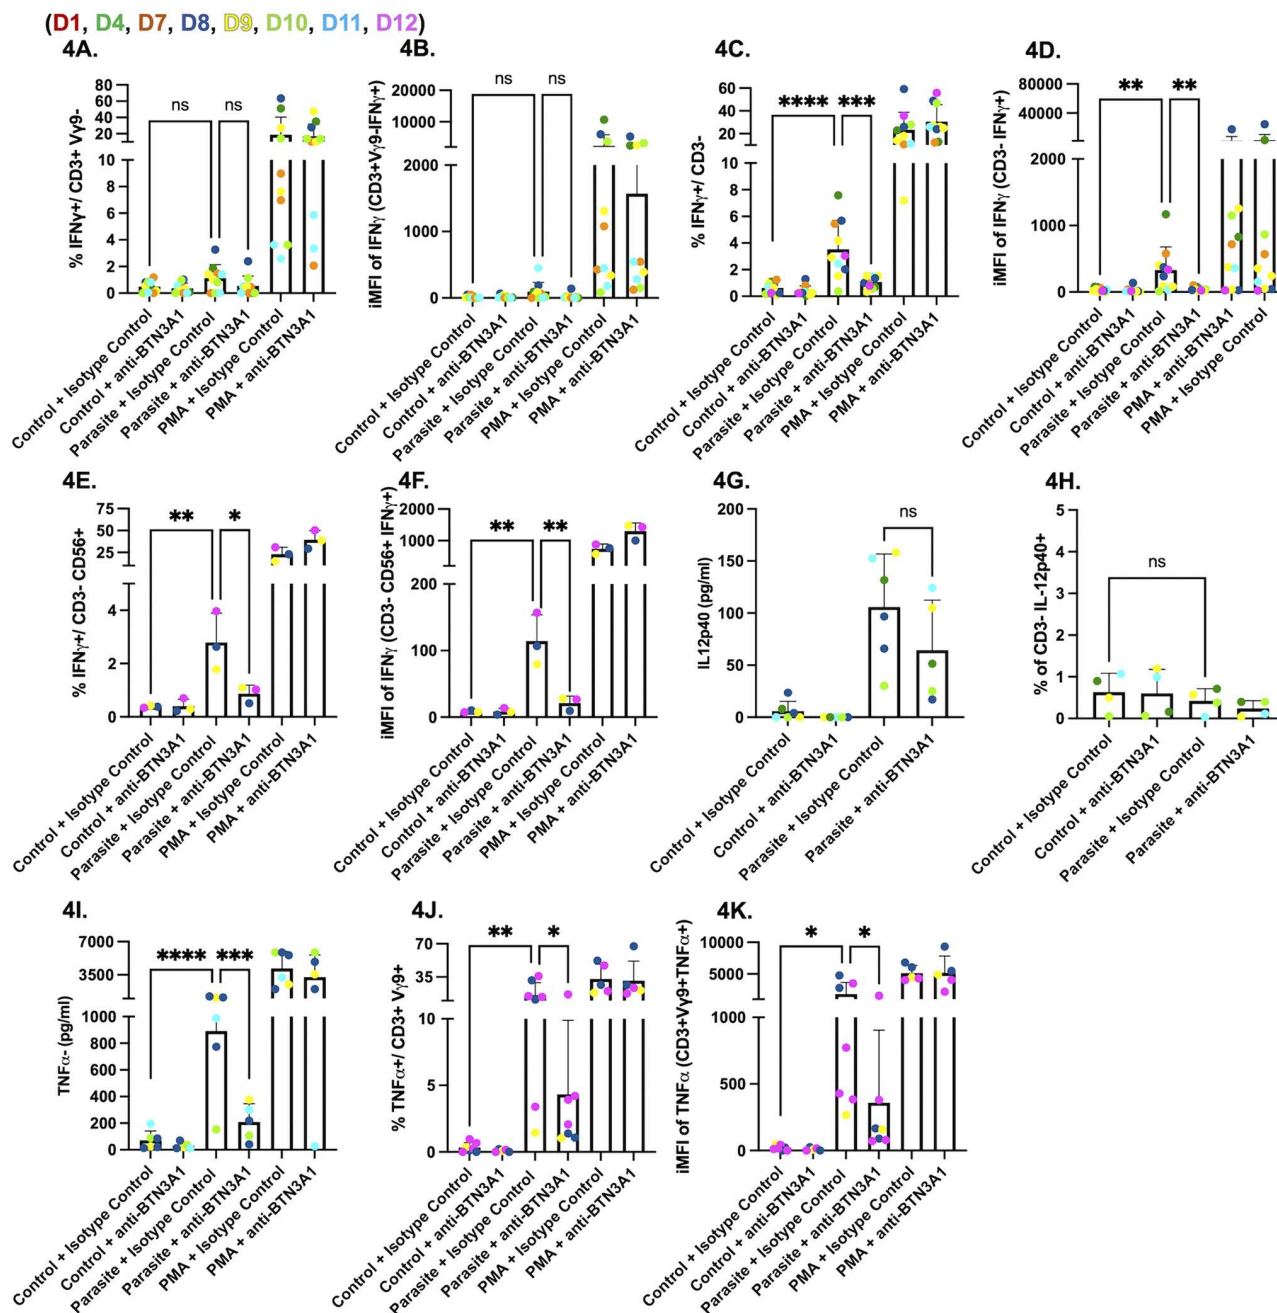

**Fig 4. BTN3A1 signaling is required for IFN $\gamma$  production by NK cells in parasite-infected PBMCs.** PBMCs ( $5 \times 10^5$  cells/well) were left untreated, infected for 24 hours with the RH $\Delta$ ompdc $\Delta$ up strain (parasite) at an MOI of 0.6, or stimulated with PMA/ionomycin (1x). Each condition was cultured with BTN3A1-blocking antibody (0.1  $\mu$ g/ml), or with IgG1 isotype control antibody (0.1  $\mu$ g/ml). PBMCs were gated on live, single lymphocytes. (A) Percentage of CD3 $^{+}$ /V $\gamma$ 9 $^{+}$ /IFN $\gamma$  $^{+}$  cells (B) iMFI of IFN $\gamma$  in the CD3 $^{+}$ /V $\gamma$ 9 $^{+}$  subset (C) Percentage of CD3 $^{+}$ /IFN $\gamma$  $^{+}$  cells. (D) iMFI of IFN $\gamma$  in CD3 $^{+}$  cells. (E) Percentage of CD3 $^{+}$ /CD56 $^{+}$ /IFN $\gamma$  $^{+}$  cells (F) iMFI of IFN $\gamma$  in CD3 $^{+}$ /CD56 $^{+}$  cells (G) IL-12p40 and (H) TNF $\alpha$  concentrations (pg/ml) in culture supernatants measured by ELISA. Data represent means  $\pm$  SD from multiple donors (individual data points shown). Statistical significance was calculated using one-way ANOVA followed by Tukey's multiple comparison test. Asterisks indicate levels of statistical significance: \*p < 0.05, \*\*p < 0.01, \*\*\*p < 0.001, \*\*\*\*p < 0.0001; ns indicates a non-significant difference.

<https://doi.org/10.1371/journal.ppat.1013829.g004>

neutralization produced a further decrease (Fig 5A). By flow cytometry, blocking IL-12 or TNF $\alpha$  had no effect on the percentage (Fig 5B) or iMFI (Fig 5C) of CD3<sup>+</sup>V $\gamma$ 9<sup>+</sup>IFN $\gamma$ <sup>+</sup> cells, which were significantly reduced only by BTN3A1 blockade and not by an IgG1 isotype control. The same pattern was observed for CD3<sup>+</sup>V $\gamma$ 9<sup>+</sup>TNF $\alpha$ <sup>+</sup> cells (Fig 5D and 5E). In contrast, CD3<sup>+</sup>CD56<sup>+</sup>IFN $\gamma$ <sup>+</sup> cells were reduced by IL-12 or TNF $\alpha$  blockade, with a significant reduction when both were combined, mirroring the effect of BTN3A1 blockade (Fig 5F and 5G). These data indicate that V $\gamma$ 9V $\delta$ 2 T cell responses potentiate NK cell IFN $\gamma$  during parasite infection and that NK cells require IL-12 with a contribution from TNF $\alpha$ . Consistent with this,

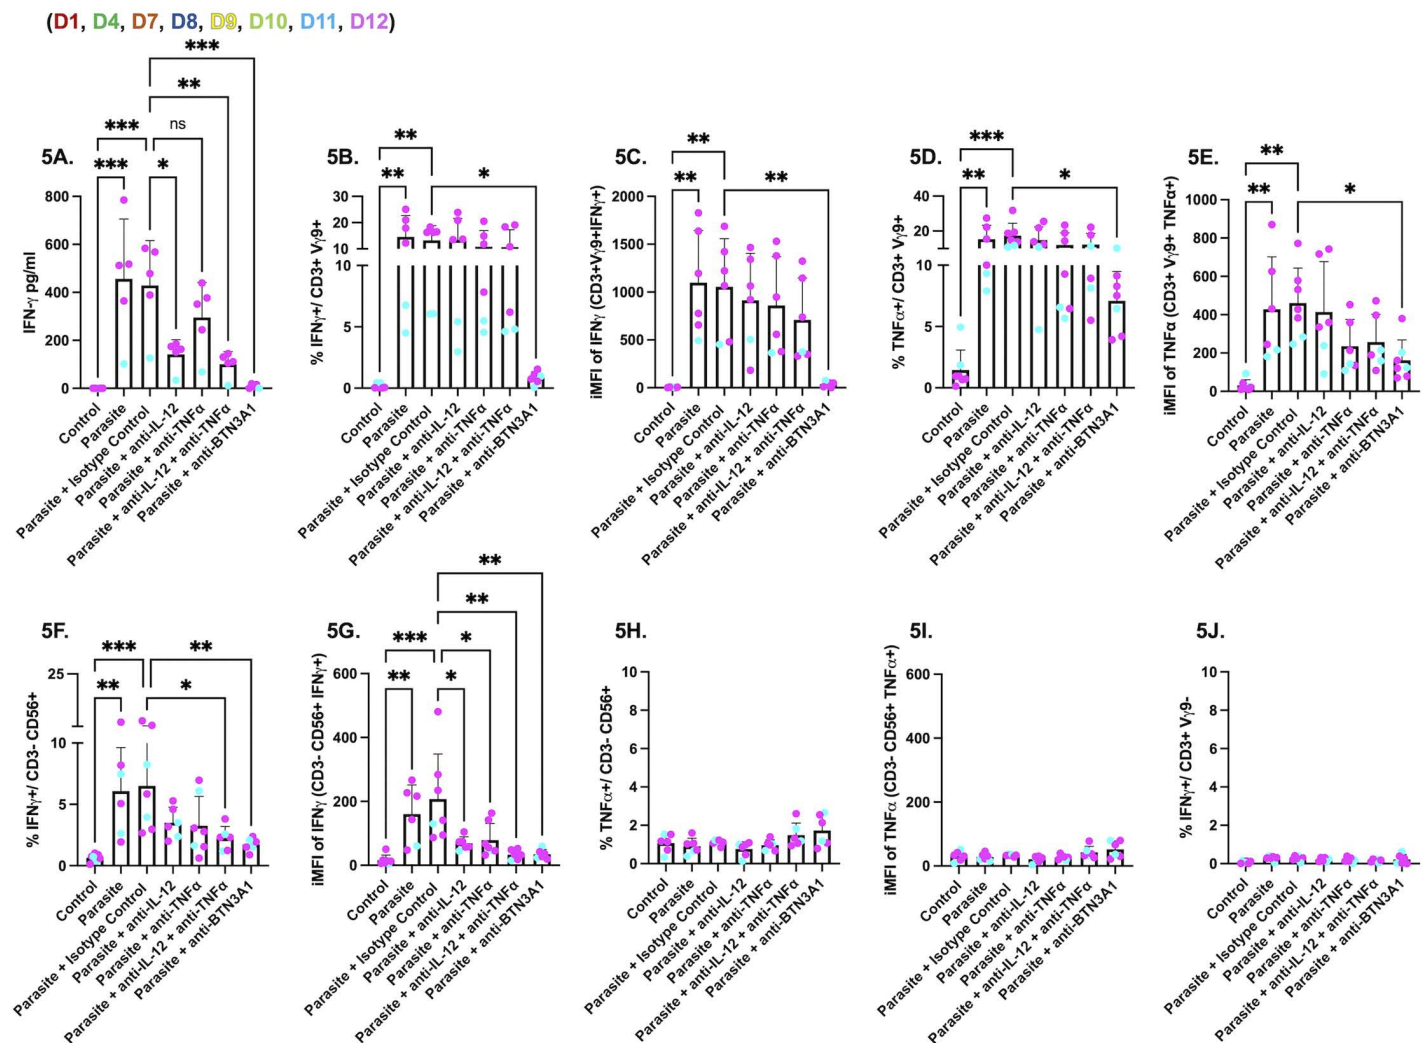

**Fig 5. NK cell IFN $\gamma$  depends on both IL-12 and TNF $\alpha$  while V $\gamma$ 9V $\delta$ 2 T cell activation is BTN3A1 dependent.** PBMCs ( $5 \times 10^5$  cells/well) were left unstimulated or infected for 24 hours with the RH $\Delta$ ompdc $\Delta$ up strain (parasite) at MOI 0.6. Neutralizing or blocking antibodies were added at culture start: anti-IL-12/23 p40 (10  $\mu$ g/ml), anti-TNF $\alpha$  (10  $\mu$ g/ml), anti-IL-12/23 p40 plus anti-TNF $\alpha$  (each 10  $\mu$ g/ml), BTN3A1-blocking antibody (0.1  $\mu$ g/ml), or IgG1 isotype control (0.1  $\mu$ g/ml). Brefeldin A was added for the final 6–8 h before intracellular staining. Flow cytometry analyses were performed on live, single lymphocytes. (A) IFN $\gamma$  concentration (pg/ml) in culture supernatants by ELISA (B) Percentage of CD3<sup>+</sup>/V $\gamma$ 9<sup>+</sup>/IFN $\gamma$ <sup>+</sup> cells (C) iMFI of IFN $\gamma$  in the CD3<sup>+</sup>/V $\gamma$ 9<sup>+</sup> subset. (D) Percentage of CD3<sup>+</sup>/V $\gamma$ 9<sup>+</sup>/TNF $\alpha$ <sup>+</sup> cells. (E) iMFI of TNF $\alpha$  in CD3<sup>+</sup>/V $\gamma$ 9<sup>+</sup> cells. (F) Percentage of CD3<sup>+</sup>/CD56<sup>+</sup>/IFN $\gamma$ <sup>+</sup> cells. (G) iMFI of IFN $\gamma$  in CD3<sup>+</sup>/CD56<sup>+</sup> cells. (H) Percentage of CD3<sup>+</sup>/CD56<sup>+</sup>/TNF $\alpha$ <sup>+</sup> cells. (I) iMFI of TNF $\alpha$  of CD3<sup>+</sup>/CD56<sup>+</sup> cells. (J) Percentage of CD3<sup>+</sup>/V $\gamma$ 9<sup>+</sup>/IFN $\gamma$ <sup>+</sup> cells. Data represent means  $\pm$  SD from multiple donors (individual data points shown). Statistical significance was calculated using one-way ANOVA followed by Tukey's multiple comparison test. Asterisks indicate levels of statistical significance: \* $p$  < 0.05, \*\* $p$  < 0.01, \*\*\* $p$  < 0.001; ns indicates a non-significant difference.

<https://doi.org/10.1371/journal.ppat.1013829.g005>

CD3<sup>+</sup>CD56<sup>+</sup>TNFα<sup>+</sup> cells were infrequent under the same conditions (Fig 5H and 5I). Conventional CD4<sup>+</sup> or CD8<sup>+</sup> T cells (CD3<sup>+</sup>Vγ9<sup>+</sup>) contributed negligibly to IFNγ. Together, these results support a model in which Vγ9Vδ2 T cells are activated through BTN3A1, while IL-12 and TNFα license NK cells to produce IFNγ during parasite infection.

## Discussion

While previous studies have indirectly suggested a role for Vγ9Vδ2 T cells during *Toxoplasma* infection, our findings provide direct evidence that Vγ9Vδ2 T cells are the dominant early source of IFNγ in parasite-infected human PBMCs. Activation of these cells requires BTN3A1 and depends largely on host-derived, mevalonate pathway phosphoantigens rather than on parasite-encoded metabolites. Furthermore, we demonstrate that Vγ9Vδ2 T cells enhance NK cell IFNγ production in a BTN3A1-dependent manner, likely through a synergistic effect of TNFα from Vγ9Vδ2 T cells and IL-12 and IL-1β secreted from infected cells.

Despite effective inhibition of exogenous HMBPP by apyrase, this enzyme failed to suppress IFNγ secretion induced by *Toxoplasma* infection. This enzyme is membrane-impermeant and therefore cannot access intracellular phosphoantigens, supporting the idea that the relevant ligand accumulates inside infected host cells. Contrary to *P. falciparum* and *L. monocytogenes* infection, where lysates effectively stimulate Vγ9Vδ2 T cells [18,39], *Toxoplasma* lysate failed to stimulate. This is further supported by our data, where infected PBMCs were cultured in 0.4 μm transwell inserts to restrict cell migration, demonstrating that direct contact with Vγ9Vδ2 T cells is required for activation (S3 Fig). A possible explanation might be that *Toxoplasma* NTPases with apyrase-like activity degrade parasite-derived phosphoantigens [40], which could lower the amount of HMBPP that reaches the host cytosol, reducing binding to BTN3A1, and consequently limiting Vγ9Vδ2 T cell activation.

Chemical and genetic probing confirmed that host, not parasite, isoprenoid biosynthesis is critical for Vγ9Vδ2 T cell activation. Lovastatin, an HMG-CoA-reductase inhibitor, blocked IFNγ production, whereas zoledronate, which blocks farnesyl-pyrophosphate synthase and causes IPP build-up, enhanced it. Transcriptomic datasets from *Toxoplasma*-infected HFFs and PBMCs show coordinated upregulation of mevalonate enzymes (3-hydroxy-3-methylglutaryl-CoA synthase (HMGCS1), mevalonate kinase (MVK), 3-hydroxy-3-methylglutaryl-CoA reductase (HMGCR), MVD, and isopentenyl-diphosphate delta isomerase (IDI1)(S1 Table) [41,42], suggesting that *Toxoplasma* actively boosts IPP synthesis to levels sensed by BTN3A1-expressing host cells. Additionally, geranylgeranyl diphosphate synthase is down-regulated, potentially limiting IPP consumption and thereby contributing to its accumulation (S1 Table) [41]. *E. coli* and *S. aureus* infections synergized with zoledronate to enhance TNFα secretion from Vγ9Vδ2 T cells, while addition of mevastatin abrogated this response entirely [43]. Host PP2A phosphatase-dependent dephosphorylation of HMGCR leading to its activation has been implicated in Vγ9Vδ2 T cell activation [43]. However, PP2A subunit expression did not change significantly in PBMCs [41](S1 Table), indicating *Toxoplasma* may use alternative mechanisms. A possible mechanism could be through the effector GRA16, which is secreted beyond the vacuole, and has been shown to increase expression of PP2A-B55 via NF-κB, leading to cell cycle arrest and apoptosis in lung carcinoma cells [44].

HMBPP-deficient *L. monocytogenes* mutants can still activate Vγ9Vδ2 T cells when infecting human monocyte-derived dendritic cells, while lysates alone failed to activate these T cells [39]. Notably, infection upregulated host mevalonate/cholesterol pathway genes like HMGCR, reinforcing the concept that host IPP is a key danger signal. Transporters such as ABCA1 and APOA1 have been proposed to export IPP [45] and ABCA1, but not APOA1 expression, is reduced in human dendritic cells when mevastatin is used during an infection with HMBPP-deficient *L. monocytogenes* mutants [39]. However, ABCA1 expression was not significantly modulated, while APOA1 expression was too low to be detected (S1 Table) [41].

BTN3A1 blockade eliminated both Vγ9Vδ2 T cell-derived IFNγ and the IFNγ from NK cells yet had no effect on IL-12 release. These observations support a model wherein Vγ9Vδ2 T cells license NK cells to secrete IFNγ during *Toxoplasma* infection. We proposed a cytokine-mediated response where IL-12 from infected cells and TNFα from Vγ9Vδ2 T cells

substantially enhance NK cell-derived IFN $\gamma$  secretion (Fig 6), which is consistent with our IL-12p40 and TNF $\alpha$  neutralization data (Fig 5). This model aligns with previous studies indicating a synergistic role of TNF $\alpha$  and IL-12 in amplifying NK cell activity [38,46]. Parasite effectors GRA15 and GRA24 are known to activate host NF- $\kappa$ B and p38 MAPK, respectively, promoting IL-12 and IL-1 $\beta$  synthesis by monocytes and dendritic cells [47–49]. IL-1 $\beta$  and IL-12 have been demonstrated to amplify IFN $\gamma$  in NK cells during *Toxoplasma* infection [50]. Additionally, using myr1 knockout parasites that fail to export dense-granule effectors, we observed no change in IFN $\gamma$  or in IFN $\gamma$  produced by CD3 $^{+}$  V $\gamma$ 9 $^{+}$  cells compared with parental infections, indicating that MYR1-dependent export is not required for early activation (S9 Fig). Future work should test whether blocking TNF $\alpha$  diminishes NK cell licensing and compromises early parasite control, and use subset-restricted infection or targeted depletion approaches to determine whether any particular infected BTN3A1 $^{+}$  population is indispensable for initiating V $\gamma$ 9V $\delta$ 2 T cell activation.

Overall, our findings challenge the notion that V $\gamma$ 9V $\delta$ 2 T cell activation is solely due to parasite-derived HMBPP. Instead, the parasite manipulates host lipid metabolism, which generates sufficient IPP for BTN3A1 engagement. V $\gamma$ 9V $\delta$ 2 T cells then act as sentinels, supplying rapid IFN $\gamma$  and TNF $\alpha$  that augment NK cell IFN $\gamma$  secretion. This layered response may compensate for the absence of TLR11/12 and IRG pathways in humans. Defining the parasite effectors and host

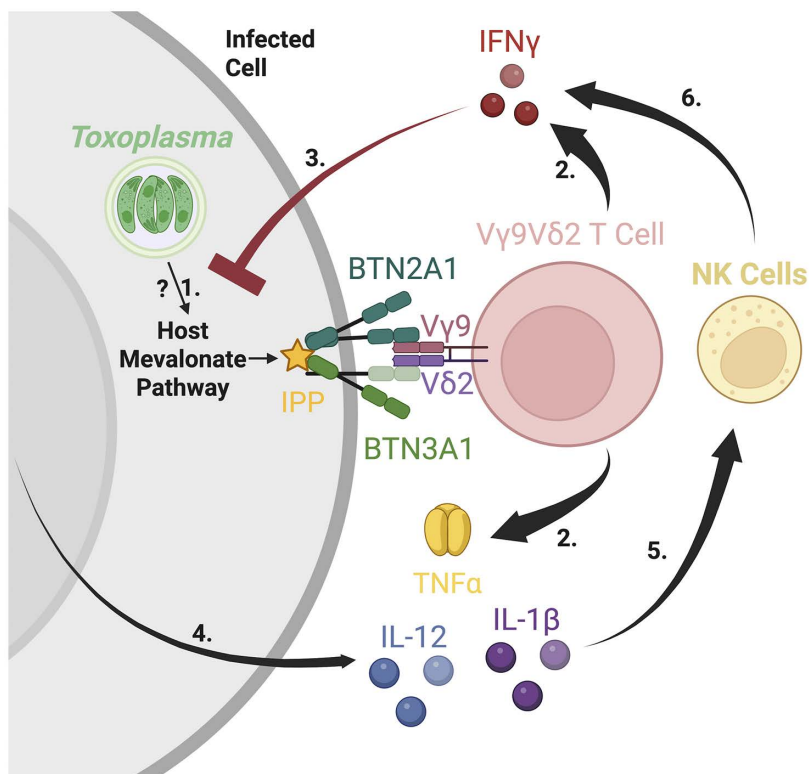

**Fig 6. Accumulation of IPP through the mevalonate pathway activates BTN3A1 and coordinates V $\gamma$ 9V $\delta$ 2 T-cell and NK-cell interferon gamma responses during *Toxoplasma* infection.** 1. *Toxoplasma* infection upregulates host-cell mevalonate-pathway enzymes, leading to the accumulation of host cell isopentenyl pyrophosphate (IPP) promoting activation of BTN3A1/2A1 dual receptor. 2. V $\gamma$ 9V $\delta$ 2 T cells recognize IPP-activated BTN3A1/2A1 leading to their activation and secretion of IFN $\gamma$  and TNF $\alpha$ . 3. IFN $\gamma$  stimulates infected cells by binding to the IFN $\gamma$  receptor leading to upregulation of multiple interferon-stimulated genes that encode anti-parasitic effectors. 4. IL-12 and IL-1 $\beta$  get secreted by infected cells 5. IL-12 and IL-1 $\beta$  synergize with TNF $\alpha$  from V $\gamma$ 9V $\delta$ 2 T cells to activate NK cells. 6. Activated NK cells secrete additional IFN $\gamma$  thereby amplifying the anti-parasite response. Model was created in BioRender. Rodriguez, F. (2025) <https://BioRender.com/8i8ocqt>.

<https://doi.org/10.1371/journal.ppat.1013829.g006>



sensors that modulate mevalonate flux will be essential for understanding, and potentially manipulating, early immunity to *Toxoplasma* and other apicomplexans.

## Materials and methods

### Ethics statement

The present study involved the utilization of fresh blood samples from healthy anonymous donors, which were provided by Vitalant, a not-for-profit community blood center. Vitalant received IRB approval from the Western Institutional Review Board under the protocol BSI-18–001. The supplier holds licenses from the U.S. Food and Drug Administration (FDA) and complies with all Clinical Laboratory Improvement Amendments (CLIA) regulatory requirements. Additionally, Vitalant is accredited by the AABB (formerly known as the American Association of Blood Banks). Throughout the research process, strict adherence to ethical guidelines was maintained to ensure the confidentiality and anonymity of the donors. Because donors were anonymous, no formal consent was obtained for this study.

### Antibodies and reagents

The BTN3A1 blocking antibody (clone 103.2) was from Creative Biolabs, and an IgG1 isotype control antibody was from Sigma. (E)-1-Hydroxy-2-methyl-2-butenyl 4-pyrophosphate lithium salt (HMBPP)(95098–1MG) and potato apyrase (A6535-100UN) was from Sigma, while isopentenyl diphosphate (IPP)(I-0050) was from Echelon Biosciences. All fluorescent and intracellular staining antibodies were from Biolegend: Brilliant Violet 711 anti-human CD3, Brilliant Violet 421 anti-human CD25, PE/Cyanine5 anti-human CD56, PE anti-human TCR V $\gamma$ 9, APC anti-human IFN $\gamma$ , FITC anti-human IL-12p40, BV650 anti-human TNF $\alpha$ , and Human TruStain FcX. Live Dead dye: Zombie NIR Live/Dead and PMA/ionomycin (500x) was from Biolegend. Staining protocols were as directed by the manufacturer (Biolegend). Ficoll-Paque Premium (17-5442-02) was from GE Healthcare. Mycalolide B (BML-T123) was from Enzo. Zoledronate disodium salt (ab143738) was from Abcam. Costar 96 well plates (3361) for ELISA were from Corning. Human blood was collected by Vitalant. Matched-pair human ELISA kits IFN $\gamma$  (CHC1233), TNF $\alpha$  (CH1753), or IL-12p40 (CHC1563) were from Thermo Fisher. Neutralizing antibodies: anti-IL-12/23 p40 and anti-TNF $\alpha$  were from Invivogen.

### Culture of cells and parasites

Human foreskin fibroblasts (HFFs) were cultured at 37°C at 5% CO<sub>2</sub> in Dulbecco's Modified Eagle Medium (DMEM; Invitrogen) supplemented with 10% heat-inactivated fetal bovine serum (HIFBS), 2 mM of L-glutamine, 50  $\mu$ g/ml penicillin/streptomycin, and 20  $\mu$ g/ml gentamicin (HFF medium). Parasites were cultured similarly in DMEM supplemented with 1% HIFBS, 50  $\mu$ g/ml penicillin/streptomycin, and 2 mM of L-glutamine (*Toxoplasma* medium). RH $\Delta$ ompdc $\Delta$ up (uracil auxotroph strain) was grown in *Toxoplasma* medium containing 250  $\mu$ M uracil (Uracil medium). Human PBMCs were cultured in RPMI-1640 medium supplemented with 25 mM HEPES, 2 mM L-glutamine, 20  $\mu$ g/ml gentamicin, 50  $\mu$ g/ml penicillin/streptomycin, and 10% HIFBS (PBMC media).

### PBMC isolation

Donor blood was added into 50 ml conical tubes and centrifuged for 20 mins at 500 x g at room temperature (RT) (no acceleration or brake). A serum aliquot was taken to test for *Toxoplasma* specific antibodies. The buffy coat was then transferred into a 15 ml conical tube containing PBS and mixed thoroughly before carefully layering over Ficoll-Paque (1:1, Histopaque-1077) and centrifuged at 680 x g for 30 mins at RT (no acceleration or brake). The PBMC interface was collected, washed in ice cold PBS, and spun at 200 x g for 10 mins at 4°C. The cell pellet was resuspended in PBMC media. Cell viability, determined by trypan blue exclusion, confirmed that over 95% of the cells were viable. PBMCs were cryopreserved in 90% FBS/10% dimethyl sulfoxide (DMSO) for later use.

### Serum test for *Toxoplasma* specific antibodies

High-binding 96-well plates were coated overnight at 4°C with lysate (0.1 µg/well) in 0.1 M bicarbonate buffer (pH 9.6). Plates were washed with PBS-T (0.05% Tween-20) and blocked for ≥1 h at room temperature with 2% casein in PBS. Human sera were diluted (1:40, 1:80, 1:160) in 1% casein, added in duplicate (50 µl/well), and incubated for 1–2 hours at room temperature. After washing, wells were incubated with HRP-conjugated mouse anti-human IgG (BD Pharmingen, 1:1000) for 1 hour in the dark. ABTS substrate (KPL) was added, and plates were read at 405 nm at 20 and 40 min (lysates). The optical density (OD) obtained with *Toxoplasma* lysate was divided by the mean OD values of *Sarcocystis neurona* and *Neospora hughesi*. A positive signal was defined as OD > 1.4.

### Determination of intracellular parasite growth

Parasite per vacuole counts were performed using 24-well plates with confluent HFF monolayers and infected with GlpT and R45K-R269K parasites with/out 100 µM fosmidomycin incubated for an hour prior to infection while RHΔ*ompdc*Δ*up* were incubated with 250 µM uracil. Parasites were fixed in 3% paraformaldehyde and stained with SAG2A and DAPI. Parasites per vacuole were quantified at 24 and 48 hours after infection and at least 100 vacuoles per strain and per condition were counted using microscopy.

### Intracellular cytokine staining

PBMCs were processed using FACS buffer (PBS, pH 7.4, with 2% HIFBS). Cells were resuspended at a concentration of  $5 \times 10^6$  cells/ml in PBMC media and plated in a 96-well round-bottomed tissue culture plate at  $5 \times 10^5$  cells per well (100 µl of cell suspension) and incubated at 37°C at 5% CO<sub>2</sub>. Single-stain and fluorescence-minus-one controls were included. Cells were stimulated with HMBPP (312 nM) or infected using RHΔ*ompdc*Δ*up* (0.6 MOI) without uracil, or with BTN3A1 blocking antibody, IgG1 isotype control antibody (0.1 µg/ml), anti-IL-12/23 p40 (10 µg/ml), anti-TNFα (10 µg/ml), or anti-IL-12/23 p40 plus anti-TNFα (each 10 µg/ml). All wells after infection or stimulation had a final volume of 200 µl. After incubating for 16 hours, PMA/ionomycin (1x) was added to positive control wells and GolgiStop to all wells (0.067%/1:1500) (BD Biosciences) for the last 8 hours. After 24 hours, the plate was then processed for staining. PBMCs were washed with 1x PBS containing 1x EDTA and stained with Zombie NIR for live/dead discrimination. The plate was then placed in ice and washed with FACS buffer. Human TruStain FcX was used to block as directed by manufacturer (Biolegend). For surface staining, a cocktail of surface-marker antibodies was used (Antibodies and reagents section). For intracellular staining, the cells were fixed and permeabilized using Cyto-Fast Fix/Perm Buffer Set (Biolegend), APC anti-human IFNγ, FITC anti-human IL-12p40, or BV650 anti-human TNFα was used as the intracellular marker. After staining, the cells were washed and resuspended in the FACS buffer for analysis on the flow cytometer.

### In vitro cytokine ELISA

PBMCs were resuspended at a concentration of  $5 \times 10^6$  cells/ml in PBMC media and plated in a 96-well round-bottomed tissue culture plate at  $5 \times 10^5$  cells per well (100 µl of cell suspension) and incubated at 37°C at 5% CO<sub>2</sub>. PBMCs were stimulated with HMBPP (312 nM) or infected using RHΔ*ompdc*Δ*up* (0.6 MOI) without uracil, with or without apyrase (200 IU/ml), or with BTN3A1 blocking antibody, IgG1 isotype control antibody (0.1 µg/ml), anti-IL-12/23 p40 (10 µg/ml), anti-TNFα (10 µg/ml), or anti-IL-12/23 p40 and anti-TNFα (each 10 µg/ml). For zoledronate and lovastatin experiments, PBMCs were treated with lovastatin (25 µM) for 1 hour, prior to stimulating with zoledronate (45 µM), RHΔ*ompdc*Δ*up* (0.6 MOI), or PMA/ionomycin (1x) for 24 hours. Supernatants were collected after 24 hours and used to determine IFNγ, TNFα, or IL-12p40 levels. All the cytokine levels were measured using commercially available matched-pair human ELISA kits (ThermoFisher; CHC1233 (IFNγ), CH1753 (TNFα), CHC1563 (IL-12p40), following the manufacturer's instructions.

### Glycerol 3-transporter confirmation in *Toxoplasma*

GlpT and R45K-R269K parasite strains were confirmed to be mycoplasma-free using GPO-3 and MGSO primers (S2 Table) [51]. To confirm type I strain, GRA6 FW and RV was used with restriction enzyme MseI, while glycerol 3-transporter was confirmed with GlpT FW1 and GlpT RV1 (S2 Table). Glycerol-3-phosphate (G3P)-transporter was tagged by TY [24], immunofluorescence assay was performed to confirm localization of the G3P transporter in GlpT and R45K-R269K parasites, RHΔ*hpt* was used as a control. Staining was done using mouse-anti-Ty, rabbit-anti-SAG2A (parasite surface marker), and DAPI. Glycerol 3-transporter amplicon was sequenced using GlpT FW1 and GlpT FW2 by Quintara Bio. Amino acid changes were confirmed in the glycerol 3-transporter sequence (arginine to lysine in positions 45 and 269 in the R45K-R269K parasite strain).

### Statistics

All statistical analyses were performed using Prism (GraphPad) version 10.3.1. Data are presented as mean ± standard deviation (SD). Statistical significance was determined using one-way ANOVA with Tukey's post hoc test for comparisons involving more than two groups, and unpaired *t*-tests or non-parametric tests with Dunn's multiple comparisons for two-group analyses, as specified in figure legends. Significance was defined as  $p < 0.05$  and denoted by asterisks in all figures.

### Supporting information

**S1 Fig. Serological screening of blood donors and flow-cytometric gating strategy for PBMCs.** (A) Donor sera were tested for *Toxoplasma*-specific antibodies by ELISA using sonicated *Toxoplasma* lysate as the test antigen and lysates of *Sarcocystis neurona* and *Neospora hughesi* as negative controls. The optical density (OD) obtained with *Toxoplasma* lysate was divided by the mean OD of the two control lysates to generate a reactive ratio for each donor. Donors 2 and 6 were not used as they were considered *Toxoplasma* positive (B) Flow-cytometry gating strategy used for identifying cell populations. PBMC events were sequentially gated in FlowJo as follows: 1. Lymphocytes (SSC-A vs. FSC-A), 2. Single cells (SSC-A vs. SSC-H), 3. Viable cells (SSC-A vs. APC-Cy7::Zombie NIR), 4. CD3<sup>+</sup> (SSC-A vs. BV711::CD3), 5. Vγ9<sup>+</sup> (SSC-A vs. PE::Vγ9), 6. IFNγ<sup>+</sup> (SSC-A vs. APC::IFNγ) or CD25<sup>+</sup> (SSC-A vs. BV421::CD25). (C-D) Dot plots show the percentage of Vγ9<sup>+</sup> cells within the live CD3<sup>+</sup> gate and the percentage of IFNγ<sup>+</sup> cells within the live CD3<sup>+</sup>/Vγ9<sup>+</sup> gate under the following conditions: unstimulated, (C) HMBPP (312 nM), HMBPP + apyrase (200 IU/ml), and PMA/ionomycin (1x). (D) Infection for 24 h with RHΔ*ompdcΔup* parasites (MOI 0.6) with or without BTN3A1 blocking antibody or IgG1 isotype control antibody (0.1 μg/ml). (TIF)

**S2 Fig. RHΔ*ompdcΔup* parasites have impaired growth without uracil.** Parasite replication was assessed by counting parasites per vacuole in RHΔ*ompdcΔup*-infected HFF monolayers cultured with or without 250 μM uracil. Parasite counts were performed at 24 hours (left) or 48 hours (right) post-infection. Samples were fixed with 3% paraformaldehyde and stained with anti-SAG2A (parasite surface marker) and DAPI. Parasites per vacuole were quantified by fluorescence microscopy. (TIF)

**S3 Fig. Transwell experiments show Vγ9Vδ2 T cell activation during infection requires direct stimulation.** PBMCs were seeded both in 24-well plates (bottom) and in 0.4 μm polyester transwell inserts (top) at  $1 \times 10^6$  cells per compartment. The 0.4 μm pores prevent cell migration while permitting diffusion of soluble factors. Inserts were stimulated for 24 h with HMBPP (312 ng/ml) with or without apyrase (200 U/ml) or were infected with RHΔ*ompdcΔup* parasites at MOI 0.6; bottom wells contained matched unstimulated PBMCs. Brefeldin A was added for the final 6–8 h. Analysis was performed on live, single lymphocytes; Vγ9Vδ2 cells were defined as CD3<sup>+</sup> Vγ9<sup>+</sup>, and the percentage of IFNγ<sup>+</sup> cells was quantified

in each compartment. HMBPP in the insert induced  $V\gamma 9V\delta 2$  IFN $\gamma$  in both insert and well, and apyrase abolished this response. Infection in the insert induced  $V\gamma 9V\delta 2$  IFN $\gamma$  only in the insert, with no increase in the well. Statistical significance was calculated using one-way ANOVA followed by Tukey's multiple comparison test. Asterisks indicate levels of statistical significance: \* $p < 0.05$ ; ns indicates a non-significant difference.

(TIF)

**S4 Fig. Distribution of *Toxoplasma* infection across PBMC subsets at 24 hours.** PBMCs ( $5 \times 10^5$  cells/well) were infected with a GFP+ *Toxoplasma* strain at MOI 0.6 or left uninfected. After 24 hours, flow cytometry was performed. Gating in FlowJo: Single cells (SSC-A vs. SSC-H), and viable cells (SSC-A vs. APC-Cy7::Zombie NIR). Infected cells were identified as GFP+ events in the FITC channel. Within the infected gate, subsets were defined as follows: T cells (CD3+, BV711), including  $V\gamma 9^+$  and  $V\gamma 9^-$  subsets ( $V\gamma 9$ , PE); CD4+ T cells (BV421); and monocytes (CD14+, PE-Cy5.5). Dot plots display the percentage of cells within each gate, reported as percent of the parent population. Infection was detected across multiple PBMC subsets without a dominant preference.

(TIF)

**S5 Fig. Comparative overview of the apicoplast 1-deoxy-D-xylulose-5-phosphate (DOXP) pathway and the host cytosolic mevalonate (MEV) pathway.** (A) The non-mevalonate DOXP pathway operates in apicoplast-containing protozoa such as *Toxoplasma* and *Plasmodium* spp., most bacteria, and in chloroplasts. Sequential reactions convert 1-deoxy-D-xylulose-5-phosphate to the phosphoantigen hydroxymethyl-butenyl pyrophosphate (HMBPP) and isopentenyl pyrophosphate (IPP). Fosmidomycin blocks DOXP reductoisomerase, halting production of both intermediates. Deletion of farnesyl-pyrophosphate synthase ( $\Delta fpps$ ) truncates the pathway downstream of IPP/HMBPP, leading to their intracellular accumulation. Created in BioRender. Rodriguez, F. (2025) <https://BioRender.com/yba9idv>. (B) Eukaryotes synthesize IPP from acetyl-CoA via the mevalonate route. The rate-limiting step, catalysed by HMG-CoA reductase (HMGCR), is inhibited by lovastatin, preventing IPP formation. Farnesyl-pyrophosphate synthase (FPPS) condenses IPP with dimethylallyl-PP; zoledronate inhibits FPPS, causing upstream IPP build-up. Gene IDs above each enzyme are based on RNA-seq data from the GEO dataset GSE119835 (S1 Table). Numbers indicate the log2Fold change expression and underlined values denote statistical significance (adjusted  $p < 0.05$ , Benjamini-Hochberg FDR) (S1 Table). S5 Fig was created in BioRender. Rodriguez, F. (2025) <https://BioRender.com/yba9idv>.

(TIF)

**S6 Fig. Fosmidomycin sensitivity in *Toxoplasma* tachyzoites requires expression of the GlpT transporter.** (A) Plaque assays were performed using 24-well plates with HFFs pre-incubated for an hour with or without 100  $\mu$ M fosmidomycin. Cultures were then infected with 300 tachyzoites of either the parental RH $\Delta$ hpt strain, the GlpT transgenic line (Ty-tagged GlpT, functional glycerol-3-phosphate transporter), or the point-mutated GlpT control (R45K-R269K). Plaques were inspected after 5 days. (B) Immunofluorescence assays confirmed expression and localization of GlpT in the GlpT and R45K-R269K strains. Staining was performed using mouse anti-Ty, rabbit anti-SAG2A (parasite surface marker), and DAPI. Images were acquired at 100x magnification. (C) Parasite replication was assessed by counting parasites per vacuole at 24 and 48 hours post-infection. HFF monolayers were pretreated with or without 100  $\mu$ M fosmidomycin 1 hour prior to infection with GlpT or R45K-R269K parasites. Plaques were not detected (ND) in GlpT parasites with fosmidomycin.

(TIF)

**S7 Fig. Lovastatin sensitivity confirms loss of FPPS activity in FPPS knockout parasites strains.** Plaque assay was performed using 24-well plates with confluent HFF monolayers pretreated for 1 hour with or without 13  $\mu$ M lovastatin. Cultures were then infected with 300 tachyzoites of RH $\Delta$ ku80 (WT), RH $\Delta$ ku80 $\Delta$ fpps (FPPS knockout), or RH $\Delta$ ku80 $\Delta$ fpps+FPPS (complemented). Cultures were then analyzed with confocal microscopy to measure plaque size. FPPS knockout parasites formed plaques in drug-free medium but failed to do so in lovastatin-treated wells. In contrast,



WT and complemented parasites formed normal plaques under both conditions, confirming that sensitivity to lovastatin results from loss of endogenous FPPS. Plaques were not detected (ND) for the  $\Delta fpps$  strain in the presence of lovastatin. (B) PBMCs were pre-incubated with lovastatin (25  $\mu$ M) for 1 hour, washed three times, and then stimulated with HMBPP (312 ng/ml) for 24 hours. PBMCs were also cultured with fosmidomycin (100  $\mu$ M), an inhibitor of the DOXP pathway, and stimulated with HMBPP as above. IFN $\gamma$  concentrations (pg/ml) in culture supernatants were measured by ELISA. Data represent means + SD from multiple donors (individual data points shown). Statistical significance was calculated using one-way ANOVA followed by Tukey's multiple comparison test. NS indicates a non-significant difference. (TIF)

**S8 Fig. *Toxoplasma* does not increase IFN $\gamma$  in conventional T cells after 48 hours.** PBMCs ( $5 \times 10^5$  cells/well) were left unstimulated or infected for 48 hours with the RH $\Delta ompdc\Delta up$  strain (parasite) at MOI 0.6. Each condition was cultured with either BTN3A1-blocking antibody (0.1  $\mu$ g/ml), or with IgG1 isotype control antibody (0.1  $\mu$ g/ml). Brefeldin A was added for the final 6–8 hours, followed by intracellular cytokine staining. Analysis was performed on live, single lymphocytes. (A) Percentage of CD3 $^+$ /V $\gamma$ 9 $^+$ /IFN $\gamma$  $^+$  cells. (B) iMFI of IFN $\gamma$  in CD3 $^+$ /V $\gamma$ 9 $^+$  cells. Data represent means + SD from multiple donors (individual data points shown). Statistical significance was calculated using one-way ANOVA followed by Tukey's multiple comparison test. Asterisks indicate levels of statistical significance: ns indicates a non-significant difference. (TIF)

**S9 Fig.  $\Delta myr1$  parasites do not alter early IFN $\gamma$  responses in PBMCs.** PBMCs ( $5 \times 10^5$  cells/well) were left unstimulated, infected for 24 hours with the RH $\Delta hpt$  (WT) or the RH $\Delta hpt\Delta myr1$  strain at MOI 0.6, or stimulated with PMA/ionomycin (1x). Brefeldin A was added for the final 6–8 hours for intracellular cytokine staining. (A) IFN $\gamma$  concentration (pg/ml) in culture supernatants measured by ELISA. (B) Percentage of CD3 $^+$ /V $\gamma$ 9 $^+$ /IFN $\gamma$  $^+$  cells among live, single lymphocytes by flow cytometry. Statistical significance was calculated using one-way ANOVA followed by Tukey's multiple comparison test. Asterisks indicate levels of statistical significance: ns indicates a non-significant difference. (TIF)

**S1 Table. Differential expression of host genes involved in the mevalonate pathway, phosphoantigen recognition, and lipid transport in PBMCs infected with *Toxoplasma gondii*.** RNA-seq data from the GEO dataset GSE119835 were analyzed using GEO2R to compare gene expression between RH strain-infected and media-treated human PBMCs. In short, five PBMCs samples were split into three conditions: untreated, infected with RH88 (MOI 3), or infected with PRU (MOI 3). After 12 hours, RNA was extracted and sequenced (41). Differential expression was assessed by comparing RH-infected to untreated samples. Genes were selected based on known roles in the mevalonate/isoprenoid biosynthesis pathway, host phosphoantigen recognition, or lipid transport. Log2 fold change (log2FC) values represent expression differences (positive = upregulated; negative = downregulated). Adjusted p-values (Benjamini-Hochberg FDR) reflect the statistical significance of differentially expressed genes. (DOCX)

**S2 Table. Primers used to test for mycoplasma, glycerol 3-transporter, and strain type.** (DOCX)

## Acknowledgments

RH $\Delta ompdc\Delta up$  was obtained from Dr. David J. Bzik [35]. GlpT and R45K-R269K parasite strains were obtained from Dr. Boris Striepen [28]. RH $\Delta ku80\Delta fpps$ , RH $\Delta ku80\Delta fpps$  + FPPS, and WT parasite strains were obtained from Dr. Silvia Moreno [36]. The authors wish to acknowledge the support of the UC Davis Comprehensive Cancer Center Flow Cytometry Shared Resource, supported by the National Cancer Institute of the National Institutes of Health under award number

P30CA093373 and James B. Pendleton Charitable Trust: BD “LSRII” Cytometer (Davis) with technical assistance from Ms. Bridget McLaughlin.

## Author contributions

**Conceptualization:** Felipe Rodriguez, Jeroen P. J. Saeij.

**Data curation:** Felipe Rodriguez.

**Formal analysis:** Felipe Rodriguez.

**Funding acquisition:** Jeroen P. J. Saeij.

**Investigation:** Felipe Rodriguez.

**Methodology:** Felipe Rodriguez, Jeroen P. J. Saeij.

**Project administration:** Jeroen P. J. Saeij.

**Resources:** Jeroen P. J. Saeij.

**Supervision:** Jeroen P. J. Saeij.

**Validation:** Felipe Rodriguez.

**Visualization:** Felipe Rodriguez.

**Writing – original draft:** Felipe Rodriguez, Jeroen P. J. Saeij.

**Writing – review & editing:** Felipe Rodriguez, Jeroen P. J. Saeij.

## References

1. Devleesschauwer B, Bouwknegt M, Dorny P, Gabriël S, Havelaar AH, Quoilin S. Risk ranking of foodborne parasites: State of the art. *Food Water-borne Parasitol.* 2017;8–9:1–13.
2. Dubey JP. Advances in the life cycle of *Toxoplasma gondii*. *Int J Parasitol.* 1998;28(7):1019–24.
3. Givens MD, Marley MSD. Infectious causes of embryonic and fetal mortality. *Theriogenology.* 2008;70(3):270–85. <https://doi.org/10.1016/j.theriogenology.2008.04.018> PMID: [18502494](https://pubmed.ncbi.nlm.nih.gov/18502494/)
4. Sibley LD. Invasion and intracellular survival by protozoan parasites. *Immunol Rev.* 2011;240(1):72–91. <https://doi.org/10.1111/j.1600-065X.2010.00990.x> PMID: [21349087](https://pubmed.ncbi.nlm.nih.gov/21349087/)
5. Dupont CD, Christian DA, Hunter CA. Immune response and immunopathology during toxoplasmosis. *Semin Immunopathol.* 2012;34(6):793–813. <https://doi.org/10.1007/s00281-012-0339-3> PMID: [22955326](https://pubmed.ncbi.nlm.nih.gov/22955326/)
6. Raetz M, Kibardin A, Sturge CR, Pifer R, Li H, Burstein E, et al. Cooperation of TLR12 and TLR11 in the IRF8-dependent IL-12 response to *Toxoplasma gondii* profilin. *J Immunol.* 2013;191(9):4818–27. <https://doi.org/10.4049/jimmunol.1301301> PMID: [24078692](https://pubmed.ncbi.nlm.nih.gov/24078692/)
7. Yarovsky F, Zhang D, Andersen JF, Bannenberg GL, Serhan CN, Hayden MS, et al. TLR11 activation of dendritic cells by a protozoan profilin-like protein. *Science.* 2005;308(5728):1626–9. <https://doi.org/10.1126/science.1109893> PMID: [15860593](https://pubmed.ncbi.nlm.nih.gov/15860593/)
8. Hakimi M-A, Olias P, Sibley LD. *Toxoplasma* effectors targeting host signaling and transcription. *Clin Microbiol Rev.* 2017;30(3):615–45. <https://doi.org/10.1128/CMR.00005-17> PMID: [28404792](https://pubmed.ncbi.nlm.nih.gov/28404792/)
9. Hunter CA, Sibley LD. Modulation of innate immunity by *Toxoplasma gondii* virulence effectors. *Nat Rev Microbiol.* 2012;10(11):766–78. <https://doi.org/10.1038/nrmicro2858> PMID: [23070557](https://pubmed.ncbi.nlm.nih.gov/23070557/)
10. Gazzinelli RT, Mendonça-Neto R, Lilue J, Howard J, Sher A. Innate resistance against *Toxoplasma gondii*: an evolutionary tale of mice, cats, and men. *Cell Host Microbe.* 2014;15(2):132–8. <https://doi.org/10.1016/j.chom.2014.01.004> PMID: [24528860](https://pubmed.ncbi.nlm.nih.gov/24528860/)
11. Niedelman W, Gold DA, Rosowski EE, Sprockholt JK, Lim D, Farid Arenas A, et al. The rhoptry proteins ROP18 and ROP5 mediate *Toxoplasma gondii* evasion of the murine, but not the human, interferon-gamma response. *PLoS Pathog.* 2012;8(6):e1002784. <https://doi.org/10.1371/journal.ppat.1002784> PMID: [22761577](https://pubmed.ncbi.nlm.nih.gov/22761577/)
12. Sibley LD. *Toxoplasma gondii*: perfecting an intracellular life style: intracellular survival of toxoplasma. *Traffic.* 2003;4(9):581–6. <https://doi.org/10.1034/j.1600-0854.2003.00117.x> PMID: [12911812](https://pubmed.ncbi.nlm.nih.gov/12911812/)
13. Randall LM, Hunter CA. Parasite dissemination and the pathogenesis of toxoplasmosis. *Eur J Microbiol Immunol (Bp).* 2011;1(1):3–9. <https://doi.org/10.1556/EuJMI.1.2011.1.3> PMID: [24466431](https://pubmed.ncbi.nlm.nih.gov/24466431/)

14. Autissier P, Soulas C, Burdo TH, Williams KC. Evaluation of a 12-color flow cytometry panel to study lymphocyte, monocyte, and dendritic cell subsets in humans. *Cytometry A*. 2010;77(5):410–9. <https://doi.org/10.1002/cyto.a.20859> PMID: [20099249](#)
15. Chen ZW. Multifunctional immune responses of HMBPP-specific V $\gamma$ 2V $\delta$ 2 T cells in *M. tuberculosis* and other infections. *Cell Mol Immunol*. 2012;10(1):58–64.
16. Shen L, Huang D, Qaqish A, Frencher J, Yang R, Shen H, et al. Fast-acting  $\gamma\delta$  T-cell subpopulation and protective immunity against infections. *Immunol Rev*. 2020;298(1):254–63. <https://doi.org/10.1111/imr.12927> PMID: [33037700](#)
17. Ryan-Payseur B, Frencher J, Shen L, Chen CY, Huang D, Chen ZW. Multieffector-functional immune responses of HMBPP-specific V $\gamma$ 2V $\delta$ 2 T cells in nonhuman primates inoculated with *Listeria monocytogenes*  $\Delta$ actA prfA\*. *J Immunol*. 2012;189(3):1285–93. <https://doi.org/10.4049/jimmunol.1200641> PMID: [22745375](#)
18. Guenot M, Loizon S, Howard J, Costa G, Baker DA, Mohabeer SY, et al. Phosphoantigen burst upon *Plasmodium falciparum* schizont rupture can distantly activate V $\gamma$ 9V $\delta$ 2 T cells. *Infect Immun*. 2015;83(10):3816–24. <https://doi.org/10.1128/IAI.00446-15> PMID: [26169273](#)
19. Frencher JT, Shen H, Yan L, Wilson JO, Freitag NE, Rizzo AN, et al. HMBPP-deficient *Listeria* mutant immunization alters pulmonary/systemic responses, effector functions, and memory polarization of V $\gamma$ 2V $\delta$ 2 T cells. *J Leukoc Biol*. 2014;96(6):957–67. <https://doi.org/10.1189/jlb.6HI1213-632R> PMID: [25114162](#)
20. Rigau M, Ostrouska S, Fulford TS, Johnson DN, Woods K, Ruan Z, et al. Butyrophilin 2A1 is essential for phosphoantigen reactivity by  $\gamma\delta$  T cells. *Science*. 2020;367(6478):eaay5516. <https://doi.org/10.1126/science.aay5516> PMID: [31919129](#)
21. Morita CT, Beckman EM, Bukowski JF, Tanaka Y, Band H, Bloom BR, et al. Direct presentation of nonpeptide prenyl pyrophosphate antigens to human  $\gamma\delta$  T cells. *Immunity*. 1995;3(4):495–507.
22. Fichtner AS, Karunakaran MM, Gu S, Boughter CT, Borowska MT, Starick L. Alpaca (*Vicugna pacos*), the first nonprimate species with a phosphoantigen-reactive V $\gamma$ 9V $\delta$ 2 T cell subset. *Proc Natl Acad Sci U S A*. 2020;117(12):6697–707.
23. Bonneville M, O'Brien RL, Born WK. Gammadelta T cell effector functions: a blend of innate programming and acquired plasticity. *Nat Rev Immunol*. 2010;10(7):467–78. <https://doi.org/10.1038/nri2781> PMID: [20539306](#)
24. Davey MS, Lin C-Y, Roberts GW, Heuston S, Brown AC, Chess JA, et al. Human neutrophil clearance of bacterial pathogens triggers anti-microbial  $\gamma\delta$  T cell responses in early infection. *PLoS Pathog*. 2011;7(5):e1002040. <https://doi.org/10.1371/journal.ppat.1002040> PMID: [21589907](#)
25. Meraviglia S, Caccamo N, Salerno A, Sireci G, Dieli F. Partial and ineffective activation of V gamma 9V delta 2 T cells by *Mycobacterium tuberculosis*-infected dendritic cells. *J Immunol*. 2010;185(3):1770–6. <https://doi.org/10.4049/jimmunol.1000966> PMID: [20592281](#)
26. Sandstrom A, Peigné CM, Léger A, Crooks JE, Konczak F, Gesnel MC, et al. The intracellular B30.2 domain of butyrophilin 3A1 binds phosphoantigens to mediate activation of human V $\gamma$ 9V $\delta$ 2 T cells. *Immunity*. 2014;40(4):490–500.
27. Karunakaran MM, Willcox CR, Salim M, Paletta D, Fichtner AS, Noll A. Butyrophilin-2A1 directly binds germline-encoded regions of the V $\gamma$ 9V $\delta$ 2 TCR and is essential for phosphoantigen sensing. *Immunity*. 2020;52(3):487–498.e6. <https://doi.org/10.1016/j.immuni.2020.02.001>
28. Nair SC, Brooks CF, Goodman CD, Sturm A, McFadden GI, Sundriyal S. Apicoplast isoprenoid precursor synthesis and the molecular basis of fosmidomycin resistance in *Toxoplasma gondii*. *J Exp Med*. 2011;208(7):1547–59.
29. Subauste CS, Chung JY, Do D, Koniaris AH, Hunter CA, Montoya JG, et al. Preferential activation and expansion of human peripheral blood gamma delta T cells in response to *Toxoplasma gondii* in vitro and their cytokine production and cytotoxic activity against *T. gondii*-infected cells. *J Clin Invest*. 1995;96(1):610–9. <https://doi.org/10.1172/JCI118076> PMID: [7615835](#)
30. Ma L, Papadopoulou M, Taton M, Genco F, Marchant A, Meroni V, et al. Effector V $\gamma$ 9V $\delta$ 2 T cell response to congenital *Toxoplasma gondii* infection. *JCI Insight*. 2021;6(16):e138066. <https://doi.org/10.1172/jci.insight.138066> PMID: [34255746](#)
31. Kilcollins AM, Li J, Hsiao CHC, Wiemer AJ. HMBPP analog prodrugs bypass energy-dependent uptake to promote efficient BTN3A1-mediated malignant cell lysis by V $\gamma$ 9V $\delta$ 2 T lymphocyte effectors. *J Immunol*. 2016;197(2):419–28.
32. Gruenbacher G, Gander H, Rahm A, Idzko M, Nussbaumer O, Thurnher M. Ecto-ATPase CD39 inactivates isoprenoid-derived V $\gamma$ 9V $\delta$ 2 T cell phosphoantigens. *Cell Rep*. 2016;16(2):444–56.
33. Komoszynski M, Wojtczak A. Apyrases (ATP diphosphohydrolases, EC 3.6.1.5): function and relationship to ATPases. *BBA-MCR*. 1996;1310(2):233–41.
34. Shooshtari P, Fortuno ES 3rd, Blimkie D, Yu M, Gupta A, Kollmann TR, et al. Correlation analysis of intracellular and secreted cytokines via the generalized integrated mean fluorescence intensity. *Cytometry A*. 2010;77(9):873–80. <https://doi.org/10.1002/cyto.a.20943> PMID: [20629196](#)
35. Fox BA, Bzik DJ. Avirulent uracil auxotrophs based on disruption of orotidine-5'-monophosphate decarboxylase elicit protective immunity to *Toxoplasma gondii*. *Infect Immun*. 2010;78(9):3744–52. <https://doi.org/10.1128/IAI.00287-10> PMID: [20605980](#)
36. Li Z-H, Ramakrishnan S, Striemen B, Moreno SNJ. *Toxoplasma gondii* relies on both host and parasite isoprenoids and can be rendered sensitive to atorvastatin. *PLoS Pathog*. 2013;9(10):e1003665. <https://doi.org/10.1371/journal.ppat.1003665> PMID: [24146616](#)
37. Mönkkönen H, Ottewill PD, Kuokkanen J, Mönkkönen J, Auriola S, Holen I. Zoledronic acid-induced IPP/Apppl production in vivo. *Life Sci*. 2007;81(13):1066–70. <https://doi.org/10.1016/j.lfs.2007.08.007> PMID: [17850825](#)
38. Gigley JP. The diverse role of NK cells in immunity to *Toxoplasma gondii* infection. *PLoS Pathog*. 2016;12(2):e1005396. <https://doi.org/10.1371/journal.ppat.1005396> PMID: [26915066](#)

39. Alice AF, Kramer G, Bambina S, Bahjat KS, Gough MJ, Crittenden MR. *Listeria monocytogenes*-infected human monocytic derived dendritic cells activate V $\gamma$ 9V $\delta$ 2 T cells independently of HMBPP production. *Sci Rep*. 2021;11(1):16347. <https://doi.org/10.1038/s41598-021-95908-5> PMID: [34381163](#)
40. Silverman JA, Qi H, Riehl A, Beckers C, Nakaar V, Joiner KA. Induced activation of the *Toxoplasma gondii* nucleoside triphosphate hydrolase leads to depletion of host cell ATP levels and rapid exit of intracellular parasites from infected cells. *J Biol Chem*. 1998;273(20):12352–9.
41. Safronova A, Araujo A, Camanzo ET, Moon TJ, Elliott MR, Beiting DP, et al. Alarmin S100A11 initiates a chemokine response to the human pathogen *Toxoplasma gondii*. *Nat Immunol*. 2019;20(1):64–72. <https://doi.org/10.1038/s41590-018-0250-8> PMID: [30455460](#)
42. Blader IJ, Manger ID, Boothroyd JC. Microarray analysis reveals previously unknown changes in *Toxoplasma gondii*-infected human cells. *J Biol Chem*. 2001;276(26):24223–31. <https://doi.org/10.1074/jbc.M100951200> PMID: [11294868](#)
43. Kistowska M, Rossy E, Sansano S, Gober H-J, Landmann R, Mori L. Dysregulation of the host mevalonate pathway during early bacterial infection activates human TCR gamma delta cells. *Eur J Immunol*. 2008;38(8):2200–9.
44. Seo S-H, Kim S-G, Shin J-H, Ham D-W, Shin E-H. *Toxoplasma* GRA16 inhibits NF- $\kappa$ B activation through PP2A-B55 upregulation in non-small-cell lung carcinoma cells. *Int J Mol Sci*. 2020;21(18):6642. <https://doi.org/10.3390/ijms21186642> PMID: [32927892](#)
45. Castella B, Kopecka J, Sciancalepore P, Mandili G, Foglietta M, Mitro N, et al. The ATP-binding cassette transporter A1 regulates phosphoantigen release and V $\gamma$ 9V $\delta$ 2 T cell activation by dendritic cells. *Nat Commun*. 2017;8:15663. <https://doi.org/10.1038/ncomms15663> PMID: [28580927](#)
46. Tripp CS, Wolf SF, Unanue ER. Interleukin 12 and tumor necrosis factor alpha are costimulators of interferon gamma production by natural killer cells in severe combined immunodeficiency mice with listeriosis, and interleukin 10 is a physiologic antagonist. *Proc Natl Acad Sci U S A*. 1993;90(8):3725–9.
47. Rosowski EE, Lu D, Julien L, Rodda L, Gaiser RA, Jensen KDC. Strain-specific activation of the NF-kappaB pathway by GRA15, a novel *Toxoplasma gondii* dense granule protein. *J Exp Med*. 2011;208(1):195–212.
48. Braun L, Brenier-Pinchart M-P, Yogavel M, Curt-Varesano A, Curt-Bertini R-L, Hussain T, et al. A *Toxoplasma* dense granule protein, GRA24, modulates the early immune response to infection by promoting a direct and sustained host p38 MAPK activation. *J Exp Med*. 2013;210(10):2071–86. <https://doi.org/10.1084/jem.20130103> PMID: [24043761](#)
49. Mukhopadhyay D, Arranz-Solis D, Saeij JPJ. *Toxoplasma* GRA15 and GRA24 are important activators of the host innate immune response in the absence of TLR11. *PLoS Pathog*. 2020;16(5):e1008586.
50. Hunter CA, Chizzonite R, Remington JS. IL-1 beta is required for IL-12 to induce production of IFN-gamma by NK cells. A role for IL-1 beta in the T cell-independent mechanism of resistance against intracellular pathogens. *J Immunol*. 1995;155(9):4347–54. <https://doi.org/10.4049/jimmunol.155.9.4347> PMID: [7594594](#)
51. van Kuppeveld FJ, Johansson KE, Galama JM, Kissing J, Bölske G, van der Logt JT, et al. Detection of mycoplasma contamination in cell cultures by a mycoplasma group-specific PCR. *Appl Environ Microbiol*. 1994;60(1):149–52. <https://doi.org/10.1128/aem.60.1.149-152.1994> PMID: [7509584](#)
